# Supplementary material
Source: HighWire-hosted journal article supplement (https://ard.bmj.com/content/79/6/778)
Supplement: inline-supplementary-material-1 [file inline-supplementary-material-1.pdf]

## **Supplementary appendix**

## Table of contents

|                                                                                                                    |    |
|--------------------------------------------------------------------------------------------------------------------|----|
| Section 1: Search strategy and PICOs.....                                                                          | 3  |
| Table S1.1: MEDLINE Search strategy: Efficacy .....                                                                | 3  |
| Table S1.2: EMBASE Search strategy: Efficacy.....                                                                  | 4  |
| Table S1.3: Cochrane Library Search strategy: Efficacy.....                                                        | 4  |
| Table S1.4: MEDLINE Search strategy: Safety .....                                                                  | 5  |
| Table S1.5: EMBASE Search strategy: Safety.....                                                                    | 7  |
| Table S1.6: Cochrane Library Search strategy: Safety .....                                                         | 8  |
| Table S1.7: Pharmacologic interventions of interest .....                                                          | 9  |
| Table S1.8: Patient population, Intervention, Control (PICO) definition. ....                                      | 10 |
| Section 2: Efficacy study characteristics of articles and abstracts included. ....                                 | 11 |
| Table S2.1: Efficacy: Details of articles and abstracts selected for inclusion. ....                               | 11 |
| Table S2.2: Efficacy: Risk of bias analysis. ....                                                                  | 13 |
| Table S2.3: Baseline characteristics of efficacy studies: Demographics. ....                                       | 16 |
| Table S2.4: Baseline characteristics of efficacy studies: Patient reported outcomes.....                           | 21 |
| Table S2.5: Baseline characteristics of efficacy studies: Arthritis / Extra-articular manifestations / X-Ray ..... | 25 |
| Section 3: Efficacy outcomes.....                                                                                  | 31 |
| Table S3.1: Efficacy outcomes: Arthritis and composite measures, PROs, Structural damage. ....                     | 31 |
| Table S3.2: Efficacy outcomes: Extra-articular efficacy outcomes of trials investigating bDMARDs....               | 36 |
| Section 4: Safety study characteristics of articles and abstracts included.....                                    | 40 |
| Table S4.1: Safety: Details of articles and abstracts selected for inclusion. ....                                 | 41 |
| Table S4.2: Safety: Risk of Bias analysis.....                                                                     | 42 |
| Table 4.2.1: Newcastle Ottawa scale for cohort studies.....                                                        | 42 |
| Table 4.2.2: Newcastle Ottawa scale for case-control studies.....                                                  | 43 |
| Table 4.2.3: Risk of bias analysis of cohort studies .....                                                         | 44 |
| Table 4.2.4: Risk of bias analysis of case-control studies .....                                                   | 45 |
| Table S4.3: Safety: Baseline characteristics of cohort and case control studies.....                               | 46 |
| Section 4: References .....                                                                                        | 47 |

## Section 1: Search strategy and PICOs

Table S1.1: MEDLINE Search strategy: Efficacy

- 1 psoriatic arthritis/ (5297)
- 2 (psoria\$ adj (arthriti\$ or arthropath\$)).tw. (6883)
- 3 ((arthriti\$ or arthropath\$) adj psoria\$).tw. (635)
- 4 oligoarthritis\$.tw. (840)
- 5 or/1-4 (8793)
- 6 randomized controlled trial.pt. (471779)
- 7 controlled clinical trial.pt. (92751)
- 8 randomized.ab. (372150)
- 9 placebo.ab. (176049)
- 10 drug therapy.fs. (2065352)
- 11 randomly.ab. (258409)
- 12 trial.ab. (385998)
- 13 groups.ab. (1608724)
- 14 or/6-13 (3993642)
- 15 exp animals/ not humans.sh. (4519948)
- 16 14 not 15 (3407424)
- 17 5 and 16 (4109)
- 18 limit 17 to yr="2015 -Current" (995)

### Table S1.2: EMBASE Search strategy: Efficacy

#18. #17 AND ([article]/lim OR [article in press]/lim) AND [humans]/lim AND (2015:py 2016:py OR 2017:py OR 2018:py OR 2019:py)

#17. #3 AND #16

#16. #5 OR #6 OR #7 OR #8 OR #9 OR #10 OR #11 OR #12 OR #13 OR #14 OR #15

#15. random\*:ab,ti

#14. 'randomized controlled trial'/exp

#13. trial:ti

#12. allocat\*:ab,ti

#11. (doubl\* NEAR/2 blind\*):ab,ti

#10. placebo\*:ab,ti

#9. crossover\*:ab,ti OR 'cross over\*':ab,ti

#8. 'single blind procedure'/de

#7. 'randomized controlled trial'/de

#6. 'double blind procedure'/de

#5. 'crossover procedure'/de

#4. #1 OR #2 OR #3

#3. oligoarthritis\*:ab,ti

#2. (psoria\* NEAR/2 (arthriti\* OR arthropath\*)):ab,ti

#1. 'psoriatic arthritis'/de

### Table S1.3: Cochrane Library Search strategy: Efficacy

#1 MeSH descriptor: [Arthritis, Psoriatic] this term only

#2 (psoria\* next (arthriti\* or arthropath\*)):ti,ab

#3 ((arthriti\* or arthropath\*) next psoria\*):ti,ab

#4 oligoarthritis\*:ti,ab

#5 #1 or #2 or #3 or #4 Publication Year from 2015 to 2018

## Table S1.4: MEDLINE Search strategy: Safety

1. psoriatic arthritis/
2. (psoria\$ adj (arthriti\$ or arthropath\$)).tw.
3. ((arthriti\$ or arthropath\$) adj psoria\$).tw.
4. oligoarthriti\$.tw.
5. or/1-4
6. (safe or safety).tw.
7. side effect\$.tw.
8. ((adverse or undesirable or harms\$ or serious or toxic) adj3 (effect\$ or reaction\$ or event\$ or outcome\$)).tw.
9. exp product surveillance, postmarketing/
10. exp adverse drug reaction reporting systems/
11. clinical trials, phase iv/
12. Clinical Trials, Phase III/
13. exp poisoning/
14. exp substance-related disorders/
15. exp drug toxicity/
16. exp abnormalities, drug induced/
17. exp drug monitoring/
18. exp drug hypersensitivity/
19. (toxicity or complication\$ or noxious or tolerability).tw.
20. exp Postoperative Complications/
21. exp Intraoperative Complications/
22. exp INFECTION/
23. infection\$.tw.
24. exp TUBERCULOSIS/
25. (Tuberculosis or tb).tw.
26. exp Neoplasms/
27. cancer\$.tw.
28. neoplasm\$.tw.
29. carcinoma\$.tw.
30. lymphoma\$.tw.
31. (leukaemia or leukemia).tw.
32. myeloma\$.tw.
33. tumo?r\$.tw.
34. melanoma\$.tw.
35. melanoma\$.tw.
36. Malignanc\$.tw.
37. Dermatitis, Atopic/
38. (dermatitis or skin exacerbat\$).tw.
39. exp Cardiovascular Diseases/
40. (cardiovasc\$ or mace).tw.
41. exp Demyelinating Diseases/
42. demyelinat\$.tw.
43. exp Herpes Zoster/
44. herpe\$.tw.
45. Venous Thromboembolism/
46. (embolism\$ or thromboembolism\$).tw.
47. exp Gastrointestinal Diseases/
48. Gastrointestinal.tw.
49. exp depressive disorder/

50. depress\$.tw.
51. exp Suicide/
52. suicid\$.tw.
53. or/6-52
54. 5 and 53
55. exp animals/ not humans.sh.
56. 54 not 55
57. limit 56 to yr="2015 -Current"

## Table S1.5: EMBASE Search strategy: Safety

#52. #51 AND (2015:py OR 2016:py OR 2017:py OR 2018:py OR 2019:py)  
 #51. #4 AND #49 AND ([article]/lim OR [article in press]/lim) AND [humans]/lim  
 #50. #4 AND #49  
 #49. #5 OR #6 OR #7 OR #8 OR #9 OR #10 OR #11 OR #12 OR #13 OR #14 OR #15 OR #16 OR #17 OR  
 #18 OR #19 OR #20 OR #21 OR #22 OR #23 OR #24 OR #25 OR #26 OR #27 OR #28 OR #29 OR #30 OR  
 #31 OR #32 OR #33 OR #34 OR #35 OR #36 OR #37 OR #38 OR #39 OR #40 OR #41 OR #42 OR #43 OR  
 #44 OR #45 OR #46 OR #47 OR #48  
 #48. suicid\*:ab,ti  
 #47. 'suicidal behavior'/exp OR 'suicide'/de  
 #46. depress\*:ab,ti  
 #45. 'depression'/exp  
 #44. gastrointestinal:ab,ti  
 #43. 'gastrointestinal disease'/de  
 #42. embolism\*:ab,ti OR thromboembolism\*:ab,ti  
 #41. 'venous thromboembolism'/exp  
 #40. herpe\*:ab,ti  
 #39. 'herpes zoster'/exp  
 #38. demyelinat\*:ab,ti  
 #37. 'demyelinating disease'/exp  
 #36. cardiovasc\*:ab,ti OR mace:ab,ti  
 #35. 'cardiovascular disease'/exp  
 #34. dermatitis:ab,ti OR 'skin exacerbat\*':ab,ti  
 #33. 'atopic dermatitis'/de  
 #32. malignanc\*.ab,ti  
 #31. melanoma\*:ab,ti  
 #30. tumor\*:ab,ti OR tumour\*:ab,ti  
 #29. myeloma:ab,ti  
 #28. leukaemia:ab,ti OR leukemia:ab,ti  
 #27. lymphoma\*:ab,ti  
 #26. carcinoma\*:ab,ti  
 #25. neoplasm\*:ab,ti  
 #24. cancer\*:ab,ti  
 #23. 'neoplasm'/exp  
 #22. tuberculosis:ab,ti OR tb:ab,ti  
 #21. 'mycobacterium tuberculosis'/de  
 #20. infection\*:ab,ti  
 #19. 'infection'/exp  
 #18. 'peroperative complication'/de  
 #17. 'postoperative complication'/exp  
 #16. toxicity:ab,ti OR complication\*:ab,ti OR noxious:ab,ti OR tolerability:ab,ti  
 #15. 'drug hypersensitivity'/exp  
 #14. 'drug monitoring'/de  
 #13. 'congenital malformation'/exp  
 #12. 'drug toxicity'/exp  
 #11. 'intoxication'/exp  
 #10. 'phase 4 clinical trial (topic)'/de  
 #9. 'postmarketing surveillance'/exp  
 #8. ((adverse OR undesirable OR harms\* OR serious OR toxic) NEAR/3 (effect\* OR reaction\* OR  
 event\* OR outcome\*)):ab,ti  
 #7. 'side effect':ab,ti OR 'side effects':ab,ti

- #6. safe:ab,ti OR safety:ab,ti
- #5. 'adverse drug reaction'/lnk OR 'complication'/lnk OR 'side effect'/lnk
- #4. #1 OR #2 OR #3
- #3. oligoarthritis\*:ab,ti
- #2. (psoria\* NEAR/2 (arthriti\* OR arthropath\*)):ab,ti
- #1. 'psoriatic arthritis'/de

### Table S1.6: Cochrane Library Search strategy: Safety

- #1 MeSH descriptor: [Arthritis, Psoriatic] this term only
- #2 (psoria\* next (arthriti\* or arthropath\*)):ti,ab
- #3 ((arthriti\* or arthropath\*) next psoria\*):ti,ab
- #4 oligoarthritis\*:ti,ab
- #5 #1 or #2 or #3 or #4 Publication Year from 2015 to 2018



Table S1.7: Pharmacologic interventions of interest

|                                                                    |                                                                                                                                                                                                                                                                                                                                                                                                                                                                                                |
|--------------------------------------------------------------------|------------------------------------------------------------------------------------------------------------------------------------------------------------------------------------------------------------------------------------------------------------------------------------------------------------------------------------------------------------------------------------------------------------------------------------------------------------------------------------------------|
| <b>Biological disease modifying anti-rheumatic drugs (bDMARDs)</b> | all formulations and duration (biosimilars included):<br>anakinra (ANA), infliximab (INF), etanercept (ETN),<br>adalimumab (ADA), golimumab (GOL), certolizumab pegol (CZP), rituximab (RTX), ofatumumab (OFA), abatacept (ABA),<br>tocilizumab (TCZ), sarilumab (SAR), sirukumab (SKM),<br>ocrelizumab (OKM), tabalumab (TBM), olokizumab (OLO),<br>clazakizumab (CZK), pateclizumab (PZK), ixekizumab (IXE),<br>brodalumab (BLM), guselkumab (GLM), ustekinumab (UKM),<br>mavrilimumab (MAV) |
| <b>Targeted synthetic DMARDs (tsDMARDs)</b>                        | Tofacitinib (TOFA), baricitinib (BARI), peficitinib (PEF),<br>filgotinib (FILGO), upadacitinib (UPA), fostamatinib (FOSTA)                                                                                                                                                                                                                                                                                                                                                                     |
| <b>Conventional synthetic DMARDs (csDMARDs)</b>                    | Methotrexate (MTX), leflunomide (LEF), sulfasalazine (SZP),<br>hydroxychloroquine (HCQ), injectable gold (GOLD),<br>chloroquine (CQ)                                                                                                                                                                                                                                                                                                                                                           |
| <b>Systemic glucocorticoids (GC)</b>                               |                                                                                                                                                                                                                                                                                                                                                                                                                                                                                                |
| <b>Any combination of the previous</b>                             |                                                                                                                                                                                                                                                                                                                                                                                                                                                                                                |

Table S1.8: Patient population, Intervention, Control (PICO) definition. See table S1.7 for specific definition of interventions.

| # | Research question                                          | Population              | Intervention               | Control                                                                                                                                                                                                                                                    | Outcome                                                                                                                                                                                                                                                                                                                                                                                                                                                                                                                                                                                                                                   |
|---|------------------------------------------------------------|-------------------------|----------------------------|------------------------------------------------------------------------------------------------------------------------------------------------------------------------------------------------------------------------------------------------------------|-------------------------------------------------------------------------------------------------------------------------------------------------------------------------------------------------------------------------------------------------------------------------------------------------------------------------------------------------------------------------------------------------------------------------------------------------------------------------------------------------------------------------------------------------------------------------------------------------------------------------------------------|
| 1 | What is the efficacy of pharmacological treatments in PsA? | Adult Patients with PsA | As described in table S1.7 | <ul style="list-style-type: none"> <li>○ Placebo</li> <li>○ (Another) bDMARD</li> <li>○ (Another) conventional synthetic DMARD</li> <li>○ (Another) targeted synthetic DMARD</li> <li>○ Steroid</li> <li>○ NSAID</li> <li>○ Combination therapy</li> </ul> | <ul style="list-style-type: none"> <li>▪ ACR 20/50/70 responses</li> <li>▪ DAPSA / DAPSA remission and low disease activity</li> <li>▪ Minimum disease activity/ very low disease activity</li> <li>▪ EULAR responses (EULAR good or moderate response; EULAR moderate response)</li> <li>▪ Psoriatic Arthritis Response Criteria (PsARC)</li> <li>▪ Psoriasis Arthritis Impact of Disease Questionnaire (PSAID)</li> <li>▪ PASI 75, PASI 90, PASI 100</li> <li>▪ Structural damage: PsA modified Sharp van der Heijde score</li> </ul>                                                                                                   |
| 2 | What is the safety of pharmacological treatments in PsA?   | As in #1                | As described in table S1.7 | As described in #1 + None (if population-based incidence rates are reported)                                                                                                                                                                               | <ul style="list-style-type: none"> <li>▪ Serious adverse events (number and rate)</li> <li>▪ Withdrawals due to AEs</li> <li>▪ Serious infections</li> <li>▪ Tuberculosis</li> <li>▪ Malignancies (lymphoma, non-melanoma skin-cancer, melanoma, solid tumors, other haematological malignancies, unspecified)</li> <li>▪ Skin exacerbation</li> <li>▪ Major Adverse Cardiac Events (MACE)</li> <li>▪ Demyelinating disease</li> <li>▪ Herpes zoster</li> <li>▪ Venous thromboembolic events</li> <li>▪ Gastrointestinal adverse events / toxicities, including IBD</li> <li>▪ Depression</li> <li>▪ Suicide attempt / suicide</li> </ul> |

## Section 2: Efficacy study characteristics of articles and abstracts included.

Table S2.1: Efficacy: Details of articles and abstracts selected for inclusion.

| PICO | Study                                  | Treatment    | Target     | Population                                                                |
|------|----------------------------------------|--------------|------------|---------------------------------------------------------------------------|
| 1    | Mease 2017a (ASTRAEA) [1]              | Abatacept    | CD80/CD86  | Mixed csDMARD-IR / TNFi-IR                                                |
| 1    | Mease 2018a (ABT-122 Phase 2) [2]      | ABT-122      | TNF/IL-17A | MTX-IR                                                                    |
| 1    | Mease 2016 (Clazakizumab Phase 2) [3]  | Clazakizumab | IL-6       | csDMARD / NSAID-IR                                                        |
| 1    | Mease 2017b (SPIRIT-P1) [4, 5]         | Ixekizumab   | IL-17A     | csDMARD-IR                                                                |
| 1    | Coates 2017 (SPIRIT-P1) [6]            |              |            |                                                                           |
| 1    | Nash 2017 (SPIRIT-P2) [7]              | Ixekizumab   | IL-17A     | TNFi-IR                                                                   |
| 1    | Nash 2018 (SPIRIT-P2) [8]              |              |            |                                                                           |
| 1    | van der Heijde 2016 (FUTURE-1) [9]     | Secukinumab  | IL-17A     | Mixed NSAID / csDMARD / TNFi-IR<br>NSAID-IR<br>Mixed csDMARD-iR / TNFi-IR |
| 1    | Kavanaugh 2016 (FUTURE-2) [10]         |              |            |                                                                           |
| 1    | Nash 2018 (FUTURE-3) [11]              |              |            |                                                                           |
| 1    | Kivitz PANLAR 2018 (FUTURE-4) [12]     |              |            |                                                                           |
| 1    | Mease 2018c (FUTURE-5) [13]            |              |            |                                                                           |
| 1    | Deodhar 2018 (Guselkumab Phase 2) [14] | Guselkumab   | IL-23p19   | Mixed csDMARD / TNFi (≤20%) IR                                            |
| 1    | Mease 2017/2018 [15, 34]               | Risankizumab | IL-23p19   | Mixed MTX / TNFi-IR                                                       |
| 1    | Araujo 2018 (ECLIPSA) [16]             | Ustekinumab  | IL-12/23   | Active Enthesitis                                                         |
| 1    | Gladman 2018 (PALACE 1-3) [17]         | Apremilast   | PDE-4      | csDMARD / TNF (≤10%) IR<br>csDMARD naïve<br>bDMARD naïve                  |
| 1    | Cutolo 2016 (PALACE-2) [18]            |              |            |                                                                           |
| 1    | Edwards 2016 (PALACE-3) [19]           |              |            |                                                                           |
| 1    | Wells 2018 (PALACE-4) [20]             |              |            |                                                                           |
| 1    | Nash 2018 (ACTIVE) [21]                |              |            |                                                                           |

|                                                                                                                                                                                                                                                                                                                     |                                            |                                       |           |                                                                           |
|---------------------------------------------------------------------------------------------------------------------------------------------------------------------------------------------------------------------------------------------------------------------------------------------------------------------|--------------------------------------------|---------------------------------------|-----------|---------------------------------------------------------------------------|
| 1                                                                                                                                                                                                                                                                                                                   | Mease 2018 ACR (SEAM-PsA) [22]             | Etanercept                            | TNF       | DMARD naïve                                                               |
| 1                                                                                                                                                                                                                                                                                                                   | Kavanaugh 2017 (GO-VIBRANT) [23]           | Golimumab                             | TNF       | csDMARD / NSAID IR                                                        |
| 1                                                                                                                                                                                                                                                                                                                   | Van Der Heijde 2017 EULAR (RAPID-PsA) [24] | Certolizumab pegol                    | TNF       |                                                                           |
| 1                                                                                                                                                                                                                                                                                                                   | Mease 2018d (EQUATOR) [25]                 | Filgotinib                            | JAK       | csDMARD-IR                                                                |
| 1                                                                                                                                                                                                                                                                                                                   | Gladman 2017 (OPAL Beyond) [26]            | Tofacitinib                           | JAK       | TNFi-IR                                                                   |
| 1                                                                                                                                                                                                                                                                                                                   | Mease 2017c (OPAL Broaden) [27]            | Tofacitinib / Adalimumab              | JAK / TNF | csDMARD-IR                                                                |
| 1                                                                                                                                                                                                                                                                                                                   | Araujo 2015 [28]                           | DMARD stopping                        |           | No MSK symptoms,<br>minimal skin/nail<br>disease for ≥6 months,<br>MTX-IR |
| 1                                                                                                                                                                                                                                                                                                                   | Moverley 2015 (RETREAT) [29]               | csDMARD / TNFi tapering +<br>stopping | TNFi      | MDA + stable disease ≥6<br>months                                         |
| 1                                                                                                                                                                                                                                                                                                                   | Kristensen 2016 [30]                       | TNFi switching                        | TNFi      |                                                                           |
| 1                                                                                                                                                                                                                                                                                                                   | Kivitz ACR 2016 [31]                       | CHS-0214 / Etanercept                 | TNFi      |                                                                           |
| 1                                                                                                                                                                                                                                                                                                                   | Jorgensen 2017 (NOR-SWITCH) [32]           | CT-P13 / Infliximab                   | TNFi      |                                                                           |
| 1                                                                                                                                                                                                                                                                                                                   | Glintborg 2017 (DANBIO) [33]               | CT-P13 / Infliximab                   | TNFi      |                                                                           |
| cs: conventional synthetic; DMARD: disease modifying anti-rheumatic drug; IL: interleukin; IR: insufficient responders; JAK: janus kinase; MDA: minimal disease activity; MSK: musculoskeletal; MTX: methotrexate; NSAID: non-steroidal anti-inflammatory drug; PDE: phosphodiesterase; TNF: tumor necrosis factor; |                                            |                                       |           |                                                                           |

Table S2.2: Efficacy: Risk of bias analysis.

| Study                                 | Random sequence generation | Allocation concealment | Blinding of participants and personnel | Blinding of outcome assessment | Incomplete outcome data | Selective reporting | Other sources of bias | Summary  | Comment  |
|---------------------------------------|----------------------------|------------------------|----------------------------------------|--------------------------------|-------------------------|---------------------|-----------------------|----------|----------|
| Mease 2017a (ASTRAEA) [1]             | Low                        | Low                    | Low                                    | Low                            | Low                     | Low                 | Low                   | Low      |          |
| Mease 2018a (ABT-122 Phase 2) [2]     | Low                        | Low                    | Low                                    | Low                            | Low                     | Low                 | Low                   | Low      |          |
| Mease 2016 (Clazakizumab Phase 2) [3] | Low                        | Low                    | Low                                    | Low                            | Low                     | Low                 | Low                   | Low      |          |
| Mease 2017b (SPIRIT-P1) [4-6]         | Low                        | Low                    | Low                                    | Low                            | Low                     | Low                 | Low                   | Low      |          |
| Nash 2017 (SPIRIT-P2) [7, 8]          | Low                        | Low                    | Low                                    | Low                            | Low                     | Low                 | Low                   | Low      |          |
| van der Heijde 2016 (FUTURE-1) [9]    | Low                        | Low                    | Low                                    | Low                            | Low                     | Low                 | Low                   | Low      |          |
| Kavanaugh 2016 (FUTURE-2) [10]        |                            |                        |                                        |                                |                         |                     |                       |          | Post-hoc |
| Nash 2018 (FUTURE-3) [11]             | Low                        | Low                    | Low                                    | Low                            | Low                     | Low                 | Low                   | Low      |          |
| Kivitz PANLAR 2018 (FUTURE-4) [12]    | Abstract                   | Abstract               | Abstract                               | Abstract                       | Abstract                | Abstract            | Abstract              | Abstract |          |
| Mease 2018c (FUTURE-5) [13]           | Low                        | Low                    | Low                                    | Low                            | Low                     | Low                 | Low                   | Low      |          |

|                                            |          |          |          |          |          |          |          |          |                     |
|--------------------------------------------|----------|----------|----------|----------|----------|----------|----------|----------|---------------------|
| Deodhar 2018 (Guselkumab Phase 2) [14]     | Low      |                     |
| Mease 2017/2018 [15, 34]                   | Abstract |                     |
| Araujo 2018 (ECLIPSA) [16]                 | Low      | Low      | High     | High     | Low      | Low      | High     | High     |                     |
| Gladman 2018 (PALACE 1-3) [17]             |          |          |          |          |          |          |          |          | Post-hoc            |
| Cutolo 2016 (PALACE-2) [18]                | Unclear  | Low      | Low      | Low      | Low      | Low      | Low      | Unclear  |                     |
| Edwards 2016 (PALACE-3) [19]               | Low      |                     |
| Wells 2018 (PALACE-4) [20]                 | Unclear  | Low      | Low      | Low      | Low      | Low      | Low      | Unclear  |                     |
| Nash 2018 (ACTIVE) [21]                    | Unclear  | Low      | Low      | Low      | Low      | Low      | Low      | Unclear  |                     |
| Mease 2018 ACR (SEAM-PsA) [22]             | Abstract |                     |
| Kavanaugh 2017 (GO-VIBRANT) [23]           | Low      |                     |
| Van Der Heijde 2017 EULAR (RAPID-PsA) [24] |          |          |          |          |          |          |          |          | Long-term extension |
| Mease 2018d (EQUATOR) [25]                 | Low      |                     |
| Gladman 2017 (OPAL Beyond) [26]            | Low      |                     |

|                                        |          |          |          |          |          |          |          |          |                                    |
|----------------------------------------|----------|----------|----------|----------|----------|----------|----------|----------|------------------------------------|
| Mease 2017c<br>(OPAL Broaden)<br>[27]  | Low      |                                    |
| Araujo 2015 [28]                       |          |          |          |          |          |          |          |          | Prospective observational<br>study |
| Moverley 2015<br>(RETREAT) [29]        | Low      | Low      | Low      | Low      | Low      | Low      | High     | High     |                                    |
| Kristensen 2016<br>[30]                |          |          |          |          |          |          |          |          | Cohort study                       |
| Kivitz ACR 2016<br>[31]                | Abstract |                                    |
| Jorgensen 2017<br>(NOR-SWITCH)<br>[32] | Low      |                                    |
| Glintborg 2017<br>(DANBIO) [33]        | High     |                                    |

Table S2.3: Baseline characteristics of efficacy studies: Demographics.

| Study                                 | Treatment              | No. of patients (n) | Mean age (years) | Mean PsO disease duration (years) | Mean PsA disease duration (years) | Female (%) | BMI (kg/m <sup>2</sup> ) |
|---------------------------------------|------------------------|---------------------|------------------|-----------------------------------|-----------------------------------|------------|--------------------------|
| Mease 2017a (ASTRAEA) [1]             | ABA ± MTX              | 213                 | 51               |                                   | 8.3                               | 56.8       | 30.7                     |
|                                       | Placebo ± MTX          | 211                 | 49.8             |                                   | 8.8                               | 53.1       | 31.3                     |
| Mease 2018a (ABT-122 Phase 2) [2]     | Placebo + MTX          | 24                  | 47.7             |                                   | 7.6                               | 50         | 26.8                     |
|                                       | ADA 40mg Q2W + MTX     | 72                  | 50.5             |                                   | 8.4                               | 45.8       | 29.4                     |
|                                       | ABT-122 120mg Q2W      | 71                  | 51               |                                   | 5.9                               | 52.1       | 29.6                     |
|                                       | ABT-122 240mg Q2W      | 73                  | 47.4             |                                   | 7.5                               | 50.7       | 28.3                     |
| Mease 2016 (Clazakizumab Phase 2) [3] | Placebo ± MTX          | 41                  | 48               |                                   | 8.5                               | 56.1       |                          |
|                                       | CKM 25 mg ± MTX        | 41                  | 49.8             |                                   | 9.6                               | 56.1       |                          |
|                                       | CKM 100 mg ± MTX       | 42                  | 49.3             |                                   | 5.6                               | 47.6       |                          |
|                                       | CKM 200 mg ± MTX       | 41                  | 44.7             |                                   | 4.7                               | 48.8       |                          |
| Mease 2017b (SPIRIT-P1) [4, 5]        | Placebo ± csDMARD      | 106                 | 50.6             | 16                                | 6.3                               | 54.7       | 29.2                     |
|                                       | IXE 80mg Q4W ± csDMARD | 107                 | 49.1             | 16.5                              | 6.2                               | 57.9       | 30.2                     |
|                                       | IXE 80mg Q2W ± csDMARD | 103                 | 49.8             | 17                                | 7.2                               | 53.4       | 28.6                     |
|                                       | ADA 40mg Q2W ± csDMARD | 101                 | 48.6             | 15.7                              | 6.9                               | 49.5       | 32.1                     |
| Coates 2017 (SPIRIT-P1) [6]           | Placebo + csDMARD      | 69                  | 51               |                                   | 6.1                               | 53.6       |                          |
|                                       | IXE 80mg Q4W + csDMARD | 68                  | 49.1             |                                   | 5.6                               | 57.4       |                          |
|                                       | IXE 80mg Q2W + csDMARD | 63                  | 49.3             |                                   | 7.4                               | 57.1       |                          |
|                                       | Placebo + MTX          | 59                  | 51.3             |                                   | 6.1                               | 57.6       |                          |
|                                       | IXE 80mg Q4W + MTX     | 57                  | 49.9             |                                   | 5.1                               | 57.9       |                          |
|                                       | IXE 80mg Q2W + MTX     | 53                  | 50.1             |                                   | 7.8                               | 56.6       |                          |
|                                       | Placebo                | 37                  | 49.9             |                                   | 6.8                               | 56.8       |                          |
|                                       | IXE 80mg Q4W           | 39                  | 49.1             |                                   | 7.3                               | 59         |                          |



|                                    |                                                |     |      |      |      |      |      |
|------------------------------------|------------------------------------------------|-----|------|------|------|------|------|
|                                    | IXE 80mg Q2W                                   | 40  | 50.5 |      | 7    | 47.5 |      |
| Nash 2017 (SPIRIT-P2) [7]          | Placebo ± csDMARD                              | 118 | 51.5 | 15.3 | 9.2  | 52.5 | 31.6 |
|                                    | IXE 80mg Q4W ± csDMARD                         | 122 | 52.6 | 15.7 | 11   | 48.4 | 30.9 |
|                                    | IXE 80mg Q2W ± csDMARD                         | 123 | 51.7 | 16.5 | 9.9  | 59.3 | 30.1 |
| Nash 2018 (SPIRIT-P2) [8]          | Placebo + csDMARD                              | 52  | 53.1 |      | 11.3 | 50   | 31.6 |
|                                    | IXE 80mg Q4W + csDMARD                         | 60  | 52.3 |      | 11.9 | 48.3 | 32.5 |
|                                    | IXE 80mg Q2W + csDMARD                         | 73  | 49.8 |      | 10.9 | 60.3 | 29.7 |
|                                    | Placebo + MTX                                  | 40  | 54.3 |      | 11.4 | 47.5 | 32   |
|                                    | IXE 80mg Q4W + MTX                             | 48  | 53.3 |      | 12   | 47.9 | 32.6 |
|                                    | IXE 80mg Q2W + MTX                             | 61  | 48.9 |      | 11   | 57.4 | 29.6 |
|                                    | Placebo                                        | 66  | 50.2 |      | 11.1 | 54.5 | 31.5 |
|                                    | IXE 80mg Q4W                                   | 62  | 52.9 |      | 15.7 | 48.4 | 29.4 |
|                                    | IXE 80mg Q2W                                   | 50  | 54.6 |      | 12.4 | 58   | 30.7 |
| van der Heijde 2016 (FUTURE-1) [9] | SEC 10mg/kg iv -> SEC 150mg Q4W s.c. ± csDMARD | 202 | 49.6 |      |      | 52.5 |      |
|                                    | SEC 10mg/kg iv -> SEC 75mg Q4W s.c. ± csDMARD  | 202 | 48.8 |      |      | 58.4 |      |
|                                    | Placebo ± csDMARD                              | 202 | 48.5 |      |      | 52.5 |      |
| Kavanaugh 2016 (FUTURE-2) [10]     | SEC pooled (TNFi-naïve) ± MTX                  | 195 | 47.1 |      |      | 49.2 | 29.7 |
|                                    | Placebo (TNF-naïve) ± MTX                      | 63  | 49.1 |      |      | 63.5 | 29.3 |
|                                    | SEC pooled (TNFi-exposed) ± MTX                | 104 | 47.7 |      |      | 48.1 | 31.3 |
|                                    | Placebo ± MTX                                  | 35  | 51.3 |      |      | 54.3 | 31.6 |
| Nash 2018 (FUTURE-3) [11]          | SEC 300mg ± MTX                                | 139 | 49.3 |      | 8.3  | 51.8 |      |
|                                    | SEC 150mg ± MTX                                | 138 | 50.1 |      | 7.7  | 55.8 |      |
|                                    | Placebo ± MTX                                  | 137 | 50.1 |      | 6.6  | 56.9 |      |
| Kivitz PANLAR 2018 (FUTURE-4) [12] | SEC 150mg with loading dose ± MTX              | 114 |      |      |      |      |      |
|                                    | SEC 150mg no loading dose                      | 113 |      |      |      |      |      |

|                                        |                                       |     |      |      |     |      |      |
|----------------------------------------|---------------------------------------|-----|------|------|-----|------|------|
|                                        | ± MTX                                 |     |      |      |     |      |      |
|                                        | Placebo ± MTX                         | 114 |      |      |     |      |      |
| Mease 2018c (FUTURE-5) [13]            | SEC 300 mg with loading dose ± MTX    | 222 | 12.8 |      | 6.7 | 51.4 |      |
|                                        | SEC 150 mg with loading dose ± MTX    | 220 | 12.9 |      | 6.7 | 49.5 |      |
|                                        | SEC 150 mg without loading dose ± MTX | 222 | 11.8 |      | 6.2 | 45.9 |      |
|                                        | Placebo ± MTX                         | 332 | 12.1 |      | 6.6 | 51.5 |      |
| Deodhar 2018 (Guselkumab Phase 2) [14] | Placebo ± MTX                         | 49  | 44.2 |      | 6.9 | 51   |      |
|                                        | GKM 100 mg ± MTX                      | 100 | 47.4 |      | 7   | 48   |      |
| Mease 2017/2018 [15, 34]               | RKM 150 mg Q4W ± MTX                  | 42  | 51.8 |      |     | 50   |      |
|                                        | RKM 150 mg wk 0, 4, 16 ± MTX          | 42  | 50.1 |      |     | 33.3 |      |
|                                        | RKM 150 mg wk 0, 12 ± MTX             | 39  | 51.6 |      |     | 43.6 |      |
|                                        | RKM 75 mg wk 0 ± MTX                  | 20  | 53.8 |      |     | 50   |      |
|                                        | Placebo ± MTX                         | 42  | 49.0 |      |     | 42.9 |      |
| Araujo 2018 (ECLIPSA) [16]             | UKM 45mg/90mg ± MTX                   | 23  | 62   |      | 2   | 56   | 26   |
|                                        | TNFi ± MTX                            | 24  | 58   |      | 3   | 25   | 25   |
| Gladman 2018 (PALACE 1-3) [17]         | Placebo (enthesitis at BL)            | 311 | 50.2 | 18   | 7.3 | 55.9 | 30.5 |
|                                        | APR 30 mg BID (enthesitis at BL)      | 327 | 50.8 | 17.6 | 7.4 | 59.9 | 30.1 |
|                                        | APR 20mg BID (enthesitis at BL)       | 307 | 49.7 | 17.9 | 7.1 | 57   | 30.4 |
|                                        | Placebo (dactylitis at BL)            | 205 | 49.2 | 17.1 | 7.2 | 51.7 | 30.6 |
|                                        | APR 30 mg BID (dactylitis at BL)      | 221 | 49.5 | 17.3 | 7.7 | 47.5 | 29.5 |
|                                        | APR 20mg BID (dactylitis at BL)       | 207 | 47.8 | 17.6 | 8   | 48.8 | 29.6 |
| Cutolo 2016 (PALACE-2) [18]            | Placebo ± csDMARD                     | 159 | 51.2 | 17.8 | 7.8 | 53.5 | 29.5 |
|                                        | APR 20mg BID ± csDMARD                | 163 | 50.9 | 17.9 | 7.8 | 58.3 | 29.3 |

|                                            |                          |     |      |      |     |      |      |
|--------------------------------------------|--------------------------|-----|------|------|-----|------|------|
|                                            | APR 30mg BID ± csDMARD   | 162 | 50.5 | 18.7 | 6.8 | 58.6 | 29.2 |
| Edwards 2016 (PALACE-3) [19]               | Placebo ± csDMARD        | 169 | 49.5 | 17.8 | 6.8 | 53.8 | 29.5 |
|                                            | APR 20mg BID ± csDMARD   | 169 | 49.6 | 18.3 | 7.7 | 53.3 | 30.1 |
|                                            | APR 30mg BID ± csDMARD   | 167 | 49.9 | 17.1 | 7.5 | 52.7 | 29.2 |
| Wells 2018 (PALACE-4) [20]                 | Placebo                  | 176 | 50.5 | 16.8 | 3.4 | 48.9 | 28.7 |
|                                            | APR 20mg BID             | 175 | 49.2 | 15.3 | 3.2 | 54.3 | 29.8 |
|                                            | APR 30mg BID             | 176 | 48.4 | 15.4 | 3.6 | 54.5 | 29.7 |
| Nash 2018 (ACTIVE) [21]                    | Placebo                  | 109 | 48   |      | 3.6 | 59.6 | 31.8 |
|                                            | APR 30mg BID             | 110 | 50.7 |      | 4   | 52.7 | 32   |
| Mease 2018 ACR (SEAM-PsA) [22]             | Placebo + MTX            | 284 | 48.7 |      | 3.6 | 56.3 | 30.6 |
|                                            | ETA 50mg QW + Placebo    | 284 | 48.5 |      | 3.1 | 46.8 | 30.4 |
|                                            | ETA 50mg QW + MTX        | 283 | 48.1 |      | 3   | 49.1 | 30   |
| Kavanaugh 2017 (GO-VIBRANT) [23]           | Placebo i.v. ± MTX       | 239 | 46.7 |      | 5.3 | 49.4 |      |
|                                            | GLM 2mg/kg i.v. ± MTX    | 241 | 45.7 |      | 6.2 | 46.9 |      |
| Van Der Heijde 2017 EULAR (RAPID-PsA) [24] | Placebo ± csDMARD        | 136 | 47.3 |      | 7.9 | 58.1 | 29.2 |
|                                            | CZP 200mg Q2W ± csDMARD  | 138 | 48.2 |      | 9.6 | 53.6 | 30.5 |
|                                            | CZP 400mg Q4W ± csDMARD  | 135 | 47.1 |      | 8.1 | 54.1 | 29.6 |
| Mease 2018d (EQUATOR) [25]                 | Placebo ± csDMARD        | 66  | 50   |      | 7   | 45   | 30.1 |
|                                            | FILGO 200mg OD ± csDMARD | 65  | 49   |      | 7   | 55   | 28.6 |
| Gladman 2017 (OPAL Beyond) [26]            | Placebo ± csDMARD        | 131 | 49   |      | 9.4 | 61   | 29.5 |
|                                            | TOFA 5mg BID ± csDMARD   | 131 | 49.5 |      | 9.6 | 49   | 30.5 |
|                                            | TOFA 10mg BID ± csDMARD  | 132 | 51.3 |      | 9.1 | 56   | 31   |
| Mease 2017c (OPAL Broaden) [27]            | Placebo ± csDMARD        | 105 | 47.7 |      | 6.4 | 53   | 28.8 |
|                                            | TOFA 5mg BID ± csDMARD   | 107 | 49.4 |      | 7.3 | 53   | 29   |
|                                            | TOFA 10mg BID ± csDMARD  | 104 | 46.9 |      | 5.4 | 60   | 29.3 |
|                                            | ADA 40mg Q2W ± csDMARD   | 106 | 47.4 |      | 5.3 | 47   | 28.8 |

ABA: abatacept; ADA: adalimumab; APR: apremilast; bDMARD: biological disease modifying drug; BID: twice daily; BMI: Body mass index; CKM: clazakizumab; csDMARD: conventional synthetic disease modifying drug; CZP: certolizumab pegol; ETA: etanercept; FILGO: filgotinib; GLM: golimumab; GKM: guselkumab; IXE: ixekizumab; mTSS: PsA modified total Sharp score; MTX: methotrexate; PASI: Psoriasis Area and Severity Index; QNW: every N weeks; Ref: reference arm; RKM: risankizumab; RoB: Risk of bias; SEC: secukinumab; TNF: Tumor necrosis factor; TOFA: tofacitinib; UKM: ustekinumab;

Table S2.4: Baseline characteristics of efficacy studies: Patient reported outcomes.

| Study                                 | Treatment              | No. of patients (n) | Mean PGA | Mean Pain | Mean HAQ-DI | Mean SF36-PCS |
|---------------------------------------|------------------------|---------------------|----------|-----------|-------------|---------------|
| Mease 2017a (ASTRAEA) [1]             | ABA ± MTX              | 213                 | 61.1     | 64.2      | 1.3         |               |
|                                       | Placebo ± MTX          | 211                 | 62.6     | 64.4      | 1.3         |               |
| Mease 2018a (ABT-122 Phase 2) [2]     | Placebo + MTX          | 24                  |          |           | 1.2         |               |
|                                       | ADA 40mg Q2W + MTX     | 72                  |          |           | 1.3         |               |
|                                       | ABT-122 120mg Q2W      | 71                  |          |           | 1.3         |               |
|                                       | ABT-122 240mg Q2W      | 73                  |          |           | 1.3         |               |
| Mease 2016 (Clazakizumab Phase 2) [3] | Placebo ± MTX          | 41                  | 64.3     | 66.7      | 1.4         |               |
|                                       | CKM 25 mg ± MTX        | 41                  | 63.6     | 60.7      | 1.4         |               |
|                                       | CKM 100 mg ± MTX       | 42                  | 62.4     | 65        | 1.3         |               |
|                                       | CKM 200 mg ± MTX       | 41                  | 61       | 59.1      | 1.4         |               |
| Mease 2017b (SPIRIT-P1) [4, 5]        | Placebo                | 106                 | 61.1     | 58.5      | 1.2         | 34            |
|                                       | IXE 80mg Q4W ± csDMARD | 107                 | 62.7     | 60.1      | 1.2         | 32.4          |
|                                       | IXE 80mg Q2W ± csDMARD | 103                 | 62.5     | 58.4      | 1.2         | 34.2          |
|                                       | ADA 40mg Q2W ± csDMARD | 101                 | 59.1     | 58.7      | 1.1         | 33.9          |
| Coates 2017 (SPIRIT-P1) [6]           | Placebo + csDMARD      | 69                  |          |           | 1.19        |               |
|                                       | IXE 80mg Q4W + csDMARD | 68                  |          |           | 1.25        |               |
|                                       | IXE 80mg Q2W + csDMARD | 63                  |          |           | 1.23        |               |
|                                       | Placebo + MTX          | 59                  |          |           | 1.21        |               |
|                                       | IXE 80mg Q4W + MTX     | 57                  |          |           | 1.21        |               |
|                                       | IXE 80mg Q2W + MTX     | 53                  |          |           | 1.25        |               |
|                                       | Placebo                | 37                  |          |           | 1.09        |               |
|                                       | IXE 80mg Q4W           | 39                  |          |           | 1.22        |               |
| IXE 80mg Q2W                          | 40                     |                     |          | 1.09      |             |               |
| Nash 2017 (SPIRIT-P2)                 | Placebo ± csDMARD      | 118                 | 64.1     | 63.9      | 1.2         | 33.9          |

|                                        |                                       |     |      |      |      |      |
|----------------------------------------|---------------------------------------|-----|------|------|------|------|
| [7]                                    | IXE 80mg Q4W ± csDMARD                | 122 | 66.4 | 63.9 | 1.2  | 34.8 |
|                                        | IXE 80mg Q2W ± csDMARD                | 123 | 66   | 62.7 | 1.2  | 34.3 |
| Nash 2018 (SPIRIT-P2) [8]              | Placebo + csDMARD                     | 52  |      |      | 1.14 |      |
|                                        | IXE 80mg Q4W + csDMARD                | 60  |      |      | 1.13 |      |
|                                        | IXE 80mg Q2W + csDMARD                | 73  |      |      | 1.14 |      |
|                                        | Placebo + MTX                         | 40  |      |      | 1.26 |      |
|                                        | IXE 80mg Q4W + MTX                    | 48  |      |      | 1.11 |      |
|                                        | IXE 80mg Q2W + MTX                    | 61  |      |      | 1.1  |      |
|                                        | Placebo                               | 66  |      |      | 1.31 |      |
|                                        | IXE 80mg Q4W                          | 62  |      |      | 1.23 |      |
|                                        | IXE 80mg Q2W                          | 50  |      |      | 1.29 |      |
| Kavanaugh 2016 (FUTURE-2) [10]         | SEC pooled (TNFi-naïve) ± MTX         | 195 |      |      | 1.2  |      |
|                                        | Placebo (TNF-naïve) ± MTX             | 63  |      |      | 1.2  |      |
|                                        | SEC pooled (TNFi-exposed) ± MTX       | 104 |      |      | 1.3  |      |
|                                        | Placebo ± MTX                         | 35  |      |      | 1.1  |      |
| Nash 2018 (FUTURE-3) [11]              | SEC 300mg ± MTX                       | 139 | 59.9 | 54.8 | 1.1  | 39.2 |
|                                        | SEC 150mg ± MTX                       | 138 | 59.8 | 54.4 | 1.2  | 37.9 |
|                                        | Placebo ± MTX                         | 137 | 60.6 | 53.3 | 1.2  | 37.4 |
| Mease 2018c (FUTURE-5) [13]            | SEC 300 mg with loading dose ± MTX    | 222 | 55   | 52.8 | 1.2  |      |
|                                        | SEC 150 mg with loading dose ± MTX    | 220 | 53.9 | 56.5 | 1.3  |      |
|                                        | SEC 150 mg without loading dose ± MTX | 222 | 54.6 | 54.5 | 1.3  |      |
|                                        | Placebo ± MTX                         | 332 | 52.5 | 53.6 | 1.3  |      |
| Deodhar 2018 (Guselkumab Phase 2) [14] | Placebo ± MTX                         | 49  | 64.7 | 61.9 | 1.3  | 34.4 |
|                                        | GKM 100 mg ± MTX                      | 100 | 67   | 62.1 | 1.4  | 33.5 |
| Araujo 2018 (ECLIPSA) [16]             | UKM 45mg/90mg ± MTX                   | 23  | 55   | 55   | 0.87 | 29.1 |
|                                        | TNFi ± MTX                            | 24  | 62   | 67   | 1.17 | 29.5 |
| Gladman 2018 (PALACE 1-3) [17]         | PLC (enthesitis at BL)                | 311 |      |      | 1.3  |      |
|                                        | APR 30 mg BID (enthesitis at BL)      | 327 |      |      | 1.3  |      |

|                                            |                                  |     |      |      |      |      |
|--------------------------------------------|----------------------------------|-----|------|------|------|------|
|                                            | APR 20mg BID (enthesitis at BL)  | 307 |      |      | 1.3  |      |
|                                            | PLC (dactylitis at BL)           | 205 |      |      | 1.3  |      |
|                                            | APR 30 mg BID (dactylitis at BL) | 221 |      |      | 1.3  |      |
|                                            | APR 20mg BID (dactylitis at BL)  | 207 |      |      | 1.2  |      |
| Cutolo 2016 (PALACE-2) [18]                | Placebo ± csDMARD                | 159 |      |      | 1.2  |      |
|                                            | APR 20mg BID ± csDMARD           | 163 |      |      | 1.1  |      |
|                                            | APR 30mg BID ± csDMARD           | 162 |      |      | 1.2  |      |
| Edwards 2016 (PALACE-3) [19]               | Placebo ± csDMARD                | 169 | 56.1 |      | 1.2  |      |
|                                            | APR 20mg BID ± csDMARD           | 169 | 54.3 |      | 1.1  |      |
|                                            | APR 30mg BID ± csDMARD           | 167 | 56.5 |      | 1.2  |      |
| Wells 2018 (PALACE-4) [20]                 | Placebo                          | 176 | 54   | 52.8 | 1    | 36.1 |
|                                            | APR 20mg BID                     | 175 | 52.3 | 54.5 | 1.1  | 35.2 |
|                                            | APR 30mg BID                     | 176 | 53.6 | 52.6 | 1.1  | 35.7 |
| Nash 2018 (ACTIVE) [21]                    | Placebo                          | 109 |      |      | 1.2  |      |
|                                            | APR 30mg BID                     | 110 |      |      | 1.25 |      |
| Mease 2018 ACR (SEAM-PsA) [22]             | Placebo + MTX                    | 284 |      |      | 1.27 | 35.6 |
|                                            | ETA 50mg QW + Placebo            | 284 |      |      | 1.15 | 37.8 |
|                                            | ETA 50mg QW + MTX                | 283 |      |      | 1.15 | 37.4 |
| Kavanaugh 2017 (GO-VIBRANT) [23]           | Placebo i.v. ± MTX               | 239 | 63   | 64   | 1.3  | 34   |
|                                            | GLM 2mg/kg i.v. ± MTX            | 241 | 65   | 64   | 1.3  | 33.1 |
| Van Der Heijde 2017 EULAR (RAPID-PsA) [24] | Placebo ± csDMARD                | 136 | 57   | 60   | 1.3  |      |
|                                            | CZP 200mg Q2W ± csDMARD          | 138 | 60.2 | 59.7 | 1.3  |      |
|                                            | CZP 400mg Q4W ± csDMARD          | 135 | 60.2 | 61.1 | 1.3  |      |
| Mease 2018d (EQUATOR) [25]                 | Placebo ± csDMARD                | 66  | 63.3 |      | 1.36 | 36.3 |
|                                            | FILGO 200mg OD ± csDMARD         | 65  | 61.8 |      | 1.43 | 35.2 |
| Gladman 2017 (OPAL Beyond) [26]            | Placebo ± csDMARD                | 131 | 55.8 | 54.9 | 1.3  | 34   |
|                                            | TOFA 5mg BID ± csDMARD           | 131 | 57.4 | 56.4 | 1.3  | 33.5 |
|                                            | TOFA 10mg BID ± csDMARD          | 132 | 58.5 | 59.5 | 1.4  | 32.1 |
| Mease 2017c (OPAL                          | Placebo ± csDMARD                | 105 | 53.9 | 53.2 | 1.1  |      |

|                                                                                                                                                                                                                                                                                                                                                                                                                                                                                                                                                                                                                                                                       |                         |     |      |      |     |  |
|-----------------------------------------------------------------------------------------------------------------------------------------------------------------------------------------------------------------------------------------------------------------------------------------------------------------------------------------------------------------------------------------------------------------------------------------------------------------------------------------------------------------------------------------------------------------------------------------------------------------------------------------------------------------------|-------------------------|-----|------|------|-----|--|
| Broaden) [27]                                                                                                                                                                                                                                                                                                                                                                                                                                                                                                                                                                                                                                                         | TOFA 5mg BID ± csDMARD  | 107 | 54.7 | 55.7 | 1.2 |  |
|                                                                                                                                                                                                                                                                                                                                                                                                                                                                                                                                                                                                                                                                       | TOFA 10mg BID ± csDMARD | 104 | 53.6 | 54.4 | 1.1 |  |
|                                                                                                                                                                                                                                                                                                                                                                                                                                                                                                                                                                                                                                                                       | ADA 40mg Q2W ± csDMARD  | 106 | 50.6 | 50.7 | 1.1 |  |
| ABA: abatacept; ADA: adalimumab; APR: apremilast; bDMARD: biological disease modifying drug; BID: twice daily; BL: baseline; CKM: clazakizumab; csDMARD: conventional synthetic disease modifying drug; CZP: certolizumab pegol; ETA: etanercept; FILGO: filgotinib; GLM: golimumab; GKM: guselkumab; HAQ-DI: Health Assessment Questionnaire Disability Index; IXE: ixekizumab; NR: not reported; MTX: methotrexate; PGA: Patients Global Assessment of disease activity; QNW: every N weeks; RKM: risankizumab; SEC: secukinumab; SF-36 PCS: Short Form-36 Health Survey Physical Component Score; TNF: Tumor necrosis factor; TOFA: tofacitinib; UKM: ustekinumab; |                         |     |      |      |     |  |



Table S2.5: Baseline characteristics of efficacy studies: Arthritis / Extra-articular manifestations / X-Ray

| Study                                     | Treatment                  | No. of patients (n) | Mean SJC66 | Mean TJC 68 | Mean EGA | Mean CRP (mg/dL) | Mean DAPSA | Mean PASDAS | Mean DAS28-CRP | Dactylitis (%) | Enthesitis (%) | Skin disease (%) | PASI (mean) | Mean mTSS |
|-------------------------------------------|----------------------------|---------------------|------------|-------------|----------|------------------|------------|-------------|----------------|----------------|----------------|------------------|-------------|-----------|
| Mease 2017a (ASTRAEA) [1]                 | ABA ± MTX                  | 213                 | 12.1       | 21          | 53.9     | 1.4              |            |             | 5              | 28.6           | 65.7           | 68.5             | 7.4         | 20        |
|                                           | Placebo ± MTX              | 211                 | 11.1       | 19.3        | 55       | 1.43             |            |             | 4.9            | 23.7           | 62.6           | 70.1             | 7.2         | 17.7      |
| Mease 2018a (ABT-122 Phase 2) [2]         | Placebo + MTX              | 24                  | 13.4       | 19          |          |                  |            |             | 4.6            | 54.2           | 58.3           | 45.8             | 8.8         |           |
|                                           | ADA 40mg Q2W + MTX         | 72                  | 14         | 23.4        |          |                  |            |             | 5.1            | 58.3           | 75             | 45.8             | 11.9        |           |
|                                           | ABT-122 120mg Q2W          | 71                  | 12.7       | 21.7        |          |                  |            |             | 5              | 56.3           | 70.4           | 60.6             | 11.8        |           |
|                                           | ABT-122 240mg Q2W          | 73                  | 14.8       | 23.6        |          |                  |            |             | 4.8            | 63             | 72.6           | 67.1             | 14.9        |           |
| Mease 2016 (CKM Phase 2) [3]              | Placebo ± MTX              | 41                  | 11.2       | 21.2        | 58.2     | 1.1              |            | 6.3         | 5              | 41.5           | 80.5           | 97.6             | 7.9         |           |
|                                           | CKM 25 mg ± MTX            | 41                  | 12.4       | 23          | 64       | 1.32             |            | 6.3         | 5.2            | 36.6           | 75.6           | 97.6             | 9.1         |           |
|                                           | CKM 100 mg ± MTX           | 42                  | 13.8       | 19          | 62.5     | 1.74             |            | 6.2         | 5.1            | 28.6           | 83.3           | 97.6             | 9.5         |           |
|                                           | CKM 200 mg ± MTX           | 41                  | 10.8       | 16.6        | 57.8     | 1.62             |            | 6.1         | 4.9            | 31.7           | 75.6           | 95.1             | 8.7         |           |
| Mease 2017b (SPIRIT-P1) [4, 5]            | Placebo                    | 106                 | 10.6       | 19.2        | 55.9     | 1.51             |            |             | 4.9            | 36.8           | 53.8           | 63.2             | 6.2         | 17.6      |
|                                           | IXE 80mg Q4W ± csDMARD     | 107                 | 11.4       | 20.5        | 57.6     | 1.28             |            |             | 5              | 50.5           | 65.4           | 68.2             | 6.9         | 19.2      |
|                                           | IXE 80mg Q2W ± csDMARD     | 103                 | 12.1       | 21.5        | 58.5     | 1.51             |            |             | 5              | 39.8           | 57.3           | 57.3             | 6           | 15.2      |
|                                           | ADA 40mg Q2W ± csDMARD     | 101                 | 9.9        | 19.3        | 55.4     | 1.32             |            |             | 4.9            | 22.8           | 55.4           | 67.3             | 5.5         | 15.9      |
| Van der Heijde EULAR 2017 (SPIRIT-P1) [5] | PLC/IXE 80mg Q4W ± csDMARD | 45                  | 9.6        | 18.5        |          |                  |            |             |                |                |                |                  |             | 11.5      |
|                                           | PLC/IXE 80mg Q2W ± csDMARD | 46                  | 10.7       | 19.2        |          |                  |            |             |                |                |                |                  |             | 24.5      |
|                                           | ADA/IXE 80mg Q4W ± csDMARD | 49                  | 10.1       | 18.8        |          |                  |            |             |                |                |                |                  |             | 15.6      |

|                             |                            |     |      |      |      |      |      |  |      |      |      |      |     |      |
|-----------------------------|----------------------------|-----|------|------|------|------|------|--|------|------|------|------|-----|------|
|                             | ADA/IXE 80mg Q2W ± csDMARD | 48  | 9.6  | 18.8 |      |      |      |  |      |      |      |      |     | 15.4 |
|                             | IXE 80mg Q4W ± csDMARD     | 97  | 11.0 | 20.8 |      |      |      |  |      |      |      |      |     | 19.6 |
|                             | IXE 80mg Q2W ± csDMARD     | 96  | 12.2 | 21.3 |      |      |      |  |      |      |      |      |     | 15.2 |
| Coates 2017 (SPIRIT-P1) [6] | Placebo + csDMARD          | 69  |      |      |      |      |      |  |      |      |      |      |     | 18.9 |
|                             | IXE 80mg Q4W + csDMARD     | 68  |      |      |      |      |      |  |      |      |      |      |     | 21.2 |
|                             | IXE 80mg Q2W + csDMARD     | 63  |      |      |      |      |      |  |      |      |      |      |     | 17.3 |
|                             | Placebo + MTX              | 59  |      |      |      |      |      |  |      |      |      |      |     | 17   |
|                             | IXE 80mg Q4W + MTX         | 57  |      |      |      |      |      |  |      |      |      |      |     | 21   |
|                             | IXE 80mg Q2W + MTX         | 53  |      |      |      |      |      |  |      |      |      |      |     | 19.2 |
|                             | Placebo                    | 37  |      |      |      |      |      |  |      |      |      |      |     | 15.3 |
|                             | IXE 80mg Q4W               | 39  |      |      |      |      |      |  |      |      |      |      |     | 15.7 |
|                             | IXE 80mg Q2W               | 40  |      |      |      |      |      |  |      |      |      |      |     | 11.9 |
| Nash 2017 (SPIRIT-P2) [7]   | Placebo ± csDMARD          | 118 | 10.3 | 23   | 58.9 | 1.21 |      |  | 5    | 11.9 | 58.5 | 56.8 | 5.2 |      |
|                             | IXE 80mg Q4W ± csDMARD     | 122 | 13.1 | 22   | 60.3 | 1.7  |      |  | 5.1  | 23   | 55.7 | 55.7 | 6.4 |      |
|                             | IXE 80mg Q2W ± csDMARD     | 123 | 13.5 | 25   | 64.6 | 1.35 |      |  | 5.1  | 16.3 | 68.3 | 55.3 | 6.2 |      |
| Nash 2018 (SPIRIT-P2) [8]   | Placebo + csDMARD          | 52  | 10.3 | 21.9 |      | 1.3  | 46.2 |  | 4.87 |      |      | 86.5 |     |      |
|                             | IXE 80mg Q4W + csDMARD     | 60  | 13.7 | 20.8 |      | 1.6  | 49.6 |  | 5.01 |      |      | 95   |     |      |
|                             | IXE 80mg Q2W + csDMARD     | 73  | 13.1 | 23.8 |      | 1.12 | 50.9 |  | 5.05 |      |      | 90.4 |     |      |
|                             | Placebo + MTX              | 40  | 10.3 | 22.6 |      | 1.57 | 47.5 |  | 4.96 |      |      | 85   |     |      |
|                             | IXE 80mg Q4W + MTX         | 48  | 13.1 | 20.8 |      | 1.67 | 49.3 |  | 5.11 |      |      | 93.8 |     |      |

|                                    |                                                |     |      |      |      |      |      |  |      |      |      |      |      |      |
|------------------------------------|------------------------------------------------|-----|------|------|------|------|------|--|------|------|------|------|------|------|
|                                    | IXE 80mg Q2W + MTX                             | 61  | 11.9 | 21   |      | 1.2  | 46.8 |  | 4.99 |      |      | 93.4 |      |      |
|                                    | Placebo                                        | 66  | 10.2 | 23.8 |      | 1.14 | 48.3 |  | 5.09 |      |      | 95.5 |      |      |
|                                    | IXE 80mg Q4W                                   | 62  | 12.4 | 23.2 |      | 1.79 | 51.1 |  | 5.19 |      |      | 98.4 |      |      |
|                                    | IXE 80mg Q2W                                   | 50  | 14.1 | 26.8 |      | 1.7  | 57.1 |  | 5.26 |      |      | 94   |      |      |
| van der Heijde 2016 (FUTURE-1) [9] | SEC 10mg/kg iv -> SEC 150mg Q4W s.c. ± csDMARD | 202 |      |      |      | 1.32 |      |  | 4.8  |      |      |      |      | 21.9 |
|                                    | SEC 10mg/kg iv -> SEC 75mg Q4W s.c. ± csDMARD  | 202 |      |      |      | 1.38 |      |  | 4.9  |      |      |      |      | 20   |
|                                    | Placebo ± csDMARD                              | 202 |      |      |      | 1.48 |      |  | 4.9  |      |      |      |      | 28.1 |
| Kavanaugh 2016 (FUTURE-2) [10]     | SEC pooled (TNFi-naïve) ± MTX                  | 195 | 10.8 | 20.3 |      |      |      |  | 4.7  | 40   | 61   | 50.8 |      |      |
|                                    | Placebo (TNFi-naïve) ± MTX                     | 63  | 10.6 | 21.9 |      |      |      |  | 4.6  | 27   | 66.7 | 49.2 |      |      |
|                                    | SEC pooled (TNFi-exposed) ± MTX                | 104 | 12.4 | 25.6 |      |      |      |  | 5    | 31.7 | 66.3 | 48.1 |      |      |
|                                    | Placebo ± MTX                                  | 35  | 14.7 | 26.1 |      |      |      |  | 4.9  | 28.6 | 65.7 | 34.3 |      |      |
| Nash 2018 (FUTURE-3) [11]          | SEC 300mg ± MTX                                | 139 | 8.9  | 19.7 | 51.8 |      |      |  | 4.5  | 33.1 | 63.3 | 44.6 | 10.1 |      |
|                                    | SEC 150mg ± MTX                                | 138 | 11.2 | 23.3 | 55.2 |      |      |  | 4.6  | 26.1 | 68.8 | 49.3 | 8.8  |      |
|                                    | Placebo ± MTX                                  | 137 | 10.3 | 21.9 | 54.8 |      |      |  | 4.7  | 26.3 | 71.5 | 43.1 | 10.4 |      |
| Mease 2018c (FUTURE-5) [13]        | SEC 300 mg with loading dose ± MTX             | 222 | 10   | 19.8 | 55.4 |      |      |  | 4.5  | 36.9 | 63.1 | 49.5 |      | 12.9 |
|                                    | SEC 150 mg with loading dose ± MTX             | 220 | 12.1 | 21.2 | 57.7 |      |      |  | 4.7  | 36.4 | 64.1 | 56.8 |      | 13.6 |
|                                    | SEC 150 mg without loading dose ± MTX          | 222 | 11.9 | 21.8 | 57.3 |      |      |  | 4.6  | 46.4 | 58.1 | 52.7 |      | 15.3 |
|                                    | Placebo ± MTX                                  | 332 | 11.7 | 21.2 | 54.3 |      |      |  | 4.6  | 37.3 | 57.8 | 48.8 |      | 15   |
| Deodhar 2018                       | Placebo ± MTX                                  | 49  | 10.6 | 20.1 | 61.9 | 0.9  |      |  |      | 47   | 63   | 13.6 | 9.9  |      |

|                                |                                  |     |      |      |      |      |      |     |     |      |      |      |     |  |
|--------------------------------|----------------------------------|-----|------|------|------|------|------|-----|-----|------|------|------|-----|--|
| (GKM Phase 2) [14]             | GKM 100 mg ± MTX                 | 100 | 11.9 | 20.7 | 63.2 | 0.9  |      |     |     | 58   | 76   | 17.2 | 12  |  |
| Araujo 2018 (ECLIPSA) [16]     | UKM 45mg/90mg ± MTX              | 23  | 4    | 4    |      | 3.5  | 20.5 |     | 4   |      |      |      | 3   |  |
|                                | TNFi ± MTX                       | 24  | 5    | 5.5  |      | 2.7  | 23.6 |     | 4.4 |      |      |      | 2.8 |  |
| Gladman 2018 (PALACE 1-3) [17] | PLC (enthesitis at BL)           | 311 | 11.6 | 22.6 |      | 1.1  |      |     | 4.8 |      |      |      | 8.8 |  |
|                                | APR 30 mg BID (enthesitis at BL) | 327 | 12.3 | 25.1 |      | 1    |      |     | 4.9 |      |      |      | 8.4 |  |
|                                | APR 20mg BID (enthesitis at BL)  | 307 | 12.4 | 24.9 |      | 0.94 |      |     | 4.8 |      |      |      | 7.5 |  |
|                                | PLC (dactylitis at BL)           | 205 | 13.3 | 22.4 |      | 1.17 |      |     | 4.8 |      |      |      | 8.1 |  |
|                                | APR 30 mg BID (dactylitis at BL) | 221 | 14.2 | 23.9 |      | 1.21 |      |     | 4.9 |      |      |      | 8.5 |  |
|                                | APR 20mg BID (dactylitis at BL)  | 207 | 14   | 24.7 |      | 1.05 |      |     | 4.7 |      |      |      | 7.8 |  |
| Cutolo 2016 (PALACE-2) [18]    | Placebo ± csDMARD                | 159 | 9.2  | 18   |      |      |      |     | 4.5 | 65.4 | 41.5 | 45.3 | 8.6 |  |
|                                | APR 20mg BID ± csDMARD           | 163 | 10.4 | 20.3 |      |      |      |     | 4.6 | 65.6 | 47.2 | 49.1 | 7.4 |  |
|                                | APR 30mg BID ± csDMARD           | 162 | 10.3 | 21.8 |      |      |      |     | 4.7 | 62.3 | 45.1 | 44.4 | 7.8 |  |
| Edwards 2016 (PALACE-3) [19]   | Placebo ± csDMARD                | 169 | 11.1 | 18.3 | 52.8 |      |      |     | 4.5 | 42   | 64.5 | 55.6 | 7.6 |  |
|                                | APR 20mg BID ± csDMARD           | 169 | 11.4 | 20.8 | 55.2 |      |      |     | 4.6 | 42   | 57.4 | 55   | 7.6 |  |
|                                | APR 30mg BID ± csDMARD           | 167 | 11.6 | 20.9 | 56.1 |      |      |     | 4.6 | 47.9 | 67.1 | 55.1 | 7.9 |  |
| Wells 2018 (PALACE-4) [20]     | Placebo                          | 176 | 11.3 | 13.7 | 54.3 | 1.1  |      | 6.6 | 4.6 | 51.1 | 65.3 | 52.8 | 6.6 |  |
|                                | APR 20mg BID                     | 175 | 11.3 | 15.1 | 54.1 | 0.9  |      | 8.3 | 4.7 | 50.9 | 66.9 | 59.4 | 8.3 |  |
|                                | APR 30mg BID                     | 176 | 10.9 | 14.4 | 51.7 | 0.8  |      | 6.6 | 4.5 | 47.7 | 63.1 | 61.9 | 6.6 |  |
| Nash 2018 (ACTIVE) [21]        | Placebo                          | 109 | 10   | 18.4 |      | 1.25 |      |     |     |      | 46.8 |      |     |  |
|                                | APR 30mg BID                     | 110 | 9    | 17.2 |      | 1.44 |      |     |     |      | 50.9 |      |     |  |

|                                            |                          |     |      |      |      |      |     |      |     |      |      |      |     |      |
|--------------------------------------------|--------------------------|-----|------|------|------|------|-----|------|-----|------|------|------|-----|------|
| Mease 2018 ACR (SEAM-PsA) [22]             | Placebo + MTX            | 284 | 12.9 | 20.9 |      |      |     |      |     |      | 67.3 | 67.6 |     | 2.76 |
|                                            | ETA 50mg QW + Placebo    | 284 | 11.5 | 18.8 |      |      |     |      |     |      | 66.5 | 63   |     | 2.97 |
|                                            | ETA 50mg QW + MTX        | 283 | 11.2 | 20   |      |      |     |      |     |      | 69.3 | 62.5 |     | 2.7  |
| Kavanaugh 2017 (GO-VIBRANT) [23]           | Placebo i.v. ± MTX       | 239 | 14.1 | 26.1 | 64   | 2    |     |      |     | 51.9 | 75.7 | 82.8 | 8.9 | 34.5 |
|                                            | GLM 2mg/kg i.v. ± MTX    | 241 | 14   | 25.1 | 62   | 1.9  |     |      |     | 55.6 | 76.8 | 81.3 | 11  | 35.5 |
| Van Der Heijde 2017 EULAR (RAPID-PsA) [24] | Placebo ± csDMARD        | 136 | 10.4 | 19.9 | 58.7 | 2    |     |      |     | 25.7 | 66.9 | 63.2 | 7.1 | 24.4 |
|                                            | CZP 200mg Q2W ± csDMARD  | 138 | 11   | 21.5 | 56.8 | 2    |     |      |     | 25.4 | 63.8 | 65.2 | 7   | 18   |
|                                            | CZP 400mg Q4W ± csDMARD  | 135 | 10.5 | 19.6 | 58.2 | 1    |     |      |     | 28.1 | 62.2 | 56.3 | 8.1 | 22.8 |
| Mease 2018d (EQUATOR) [25]                 | Placebo ± csDMARD        | 66  | 12.7 | 21.6 | 66   | 10.9 | 6.2 | 47.8 |     |      |      | 61   | 6.9 |      |
|                                            | FILGO 200mg OD ± csDMARD | 65  | 11.6 | 18.3 | 66.1 | 13.9 | 6.1 | 44   |     |      |      | 65   | 6.5 |      |
| Gladman 2017 (OPAL Beyond) [26]            | Placebo ± csDMARD        | 131 | 10.5 | 19.8 | 53.7 | 0.44 |     |      | 4.4 | 48   | 71   | 66   | 7.1 |      |
|                                            | TOFA 5mg BID ± csDMARD   | 131 | 12.1 | 20.5 | 53.5 | 0.57 |     |      | 4.5 | 50   | 63   | 61   | 7.6 |      |
|                                            | TOFA 10mg BID ± csDMARD  | 132 | 12.8 | 25.5 | 55.8 | 0.49 |     |      | 4.7 | 49   | 75   | 61   | 8.8 |      |
| Mease 2017c (OPAL Broaden) [27]            | Placebo ± csDMARD        | 105 | 11.5 | 20.6 | 53.8 |      |     |      | 4.5 | 55   | 62   | 78   | 6.6 | 17.6 |
|                                            | TOFA 5mg BID ± csDMARD   | 107 | 12.9 | 20.5 | 54.6 |      |     |      | 4.6 | 57   | 70   | 77   | 5.6 | 17.1 |
|                                            | TOFA 10mg BID ± csDMARD  | 104 | 11.7 | 20.3 | 55.2 |      |     |      | 4.5 | 58   | 62   | 67   | 7.8 | 10.4 |
|                                            | ADA 40mg Q2W ± csDMARD   | 106 | 9.8  | 12.9 | 50.5 |      |     |      | 4.4 | 55   | 72   | 74   | 7   | 14.4 |

ABA: abatacept; ADA: adalimumab; APR: apremilast; bDMARD: biological disease modifying drug; BID: twice daily; BL: baseline; CKM: clazakizumab; CRP: C-reactive protein; csDMARD: conventional synthetic disease modifying drug; CZP: certolizumab pegol; DAPSA: Disease Activity Index for Psoriatic Arthritis; DAS28-CRP: Disease Activity Score using 28-joint count assessment and CRP; EGA: evaluators global assessment of disease activity; ETA: etanercept; FILGO: filgotinib; GLM: golimumab; GKM: guselkumab; IXE:

ixekizumab; mTSS: PsA modified total Sharp score; NR: not reported; MTX: methotrexate; PASDAS: Psoriatic Arthritis Disease Activity Score; PASI: Psoriasis Area and Severity Index; QNW: every N weeks; Ref: reference arm; RKM: risankizumab; SEC: secukinumab; SJC: swollen joint count; TJC: tender joint count; TNF: Tumor necrosis factor; TOFA: tofacitinib; UKM: ustekinumab;

## Section 3: Efficacy outcomes

Table S3.1: Efficacy outcomes: Arthritis and composite measures, PROs, Structural damage.

| Study                                     | Treatment                  | No. of patients (n) | Timepoint (weeks) | ACR20 (%) | ACR50 (%) | ACR70 (%) | ΔDAPSA (%) | DAS28-CRP<2.6 | ΔHAQ-DI | ΔSF36-PCS | MDA (%) | ΔmTSS |
|-------------------------------------------|----------------------------|---------------------|-------------------|-----------|-----------|-----------|------------|---------------|---------|-----------|---------|-------|
| Mease 2017a (ASTRAEA) [1]                 | ABA ± MTX                  | 213                 | 24                | 39.4      | 19.2      | 10.3      | -18.75     |               | -0.33   | 5.11      | 11.7    | 0.3   |
|                                           | Placebo ± MTX              | 211                 |                   | 22.3      | 12.3      | 6.6       | -13        |               | -0.2    | 3.69      | 8.1     | 0.35  |
| Mease 2018a (ABT-122 Phase 2) [2]         | Placebo + MTX              | 24                  | 12                | 25        | 12.5      | 4.2       | 16.7       |               | -0.28   |           |         |       |
|                                           | ADA 40mg Q2W + MTX         | 72                  |                   | 68.1      | 37.5      | 15.3      | 40         |               | -0.58   |           |         |       |
|                                           | ABT-122 120mg Q2W          | 71                  |                   | 64.8      | 36.6      | 22.5      | 45.1       |               | -0.55   |           |         |       |
|                                           | ABT-122 240mg Q2W          | 73                  |                   | 75.3      | 53.4      | 31.5      | 52.1       |               | -0.56   |           |         |       |
| Mease 2016 (Clazakizumab Phase 2) [3]     | Placebo ± MTX              | 41                  | 16                | 29.3      | 7.3       | 0.1       |            | 12.2          | -0.27   | 1.4       |         |       |
|                                           | CKM 25 mg ± MTX            | 41                  |                   | 46.3      | 29.3      | 28.6      |            | 36.6          | -0.44   | 1.2       |         |       |
|                                           | CKM 100 mg ± MTX           | 42                  |                   | 52.4      | 35.7      | 24.9      |            | 47.6          | -0.4    | 3.7       |         |       |
|                                           | CKM 200 mg ± MTX           | 41                  |                   | 39        | 17.1      | 16.5      |            | 26.8          | -0.26   | 1.1       |         |       |
| Mease 2017b (SPIRIT-P1) [4]               | Placebo                    | 106                 | 24                | 30.2      | 15.1      | 5.7       |            |               | -0.18   |           |         | 0.49  |
|                                           | IXE 80mg Q4W ± csDMARD     | 107                 |                   | 57.9      | 40.2      | 23.4      |            |               | -0.44   |           |         | 0.17  |
|                                           | IXE 80mg Q2W ± csDMARD     | 103                 |                   | 62.1      | 46.6      | 34        |            |               | -0.5    |           |         | 0.08  |
|                                           | ADA 40mg Q2W ± csDMARD     | 101                 |                   | 57.4      | 38.6      | 25.7      |            |               | -0.37   |           |         | 0.1   |
| Van der Heijde EULAR 2017 (SPIRIT-P1) [5] | PLC/IXE 80mg Q4W ± csDMARD | 45                  | 52                |           |           |           |            |               |         |           |         | 0.27  |
|                                           | PLC/IXE 80mg Q2W ± csDMARD | 46                  |                   |           |           |           |            |               |         |           |         | 0.41  |
|                                           | ADA/IXE 80mg Q4W ± csDMARD | 49                  |                   |           |           |           |            |               |         |           |         | 0.32  |
|                                           | ADA/IXE 80mg Q2W ± csDMARD | 48                  |                   |           |           |           |            |               |         |           |         | -0.03 |
|                                           | IXE 80mg Q4W ± csDMARD     | 97                  |                   |           |           |           |            |               |         |           |         | 0.54  |

|                                    |                                                |     |       |      |      |      |  |       |       |      |      |            |
|------------------------------------|------------------------------------------------|-----|-------|------|------|------|--|-------|-------|------|------|------------|
|                                    | IXE 80mg Q2W ± csDMARD                         | 96  |       |      |      |      |  |       |       |      |      | 0.09       |
| Coates 2017 (SPIRIT-P1) [6]        | Placebo + csDMARD                              | 69  | 24    |      |      |      |  |       |       |      |      | 0.44       |
|                                    | IXE 80mg Q4W + csDMARD                         | 68  |       |      |      |      |  |       |       |      |      | 0.11       |
|                                    | IXE 80mg Q2W + csDMARD                         | 63  |       |      |      |      |  |       |       |      |      | 0.11       |
|                                    | Placebo + MTX                                  | 59  |       |      |      |      |  |       |       |      |      | 0.52       |
|                                    | IXE 80mg Q4W + MTX                             | 57  |       |      |      |      |  |       |       |      |      | 0.13       |
|                                    | IXE 80mg Q2W + MTX                             | 53  |       |      |      |      |  |       |       |      |      | 0.14       |
|                                    | Placebo                                        | 37  |       |      |      |      |  |       |       |      |      | 0.57       |
|                                    | IXE 80mg Q4W                                   | 39  |       |      |      |      |  |       |       |      |      | 0.25       |
|                                    | IXE 80mg Q2W                                   | 40  |       |      |      |      |  |       |       |      |      | 0.03       |
| Nash 2017 (SPIRIT-P2) [7]          | Placebo ± csDMARD                              | 118 | 24    | 19.5 | 5.1  | 0    |  |       | -0.2  | 3.3  | 3.4  |            |
|                                    | IXE 80mg Q4W ± csDMARD                         | 122 |       | 53.3 | 35.2 | 22.1 |  |       | -0.6  | 8.9  | 27.9 |            |
|                                    | IXE 80mg Q2W ± csDMARD                         | 123 |       | 48   | 33.3 | 12.2 |  |       | -0.4  | 8.2  | 23.6 |            |
| van der Heijde 2016 (FUTURE-1) [9] | SEC 10mg/kg iv -> SEC 150mg Q4W s.c. ± csDMARD | 202 | 24/52 |      |      |      |  |       |       |      |      | 0.13/0.23  |
|                                    | SEC 10mg/kg iv -> SEC 75mg Q4W s.c. ± csDMARD  | 202 |       |      |      |      |  |       |       |      |      | 0.02/0.20  |
|                                    | Placebo ± csDMARD                              | 202 |       |      |      |      |  |       |       |      |      | 0.57/-0.03 |
| Kavanaugh 2016 (FUTURE-2) [10]     | SEC 300mg (TNF-naïve) ± MTX                    | 67  | 24    | 58.2 | 38.8 | 22.4 |  | -1.76 | -0.59 | 8.05 |      |            |
|                                    | SEC 150mg (TNF-naïve) ± MTX                    | 63  |       | 63.5 | 44.4 | 27.0 |  | -1.69 | -0.55 | 7.91 |      |            |
|                                    | SEC 75mg (TNF-naïve) ± MTX                     | 65  |       | 36.9 | 24.6 | 6.2  |  | -1.27 | -0.37 | 5.37 |      |            |
|                                    | Placebo (TNF-naïve) ± MTX                      | 63  |       | 15.9 |      | 1.6  |  | -1.11 | -0.35 | 2.08 |      |            |
|                                    | SEC 300mg (TNF-exposed) ± MTX                  | 33  |       | 45.5 | 27.3 | 15.2 |  | -1.39 | -0.53 | 6.56 |      |            |
|                                    | SEC 150mg (TNF-exposed) ± MTX                  | 37  |       | 29.7 | 18.9 | 10.8 |  | -1.45 | -0.35 | 4.21 |      |            |
|                                    | SEC 75mg (TNF-exposed) ± MTX                   | 34  |       | 14.7 | 5.9  | 5.9  |  | -0.89 | -0.23 | 3.15 |      |            |



|                                        |                                       |     |    |      |      |      |       |       |       |      |      |                   |
|----------------------------------------|---------------------------------------|-----|----|------|------|------|-------|-------|-------|------|------|-------------------|
|                                        | Placebo (TNF-exposed) ± MTX           | 35  |    | 14.3 | 8.6  | 0    |       | -0.69 | -0.23 | 2.65 |      |                   |
| Nash 2018 (FUTURE-3) [11]              | SEC 300mg ± MTX                       | 139 | 24 | 48.2 | 34.5 |      |       |       | -0.38 |      |      |                   |
|                                        | SEC 150mg ± MTX                       | 138 |    | 42   | 18.8 |      |       |       | -0.27 |      |      |                   |
|                                        | Placebo ± MTX                         | 137 |    | 16.1 | 8.8  |      |       |       | -0.17 |      |      |                   |
| Kivitz PANLAR 2018 (FUTURE-4) [12]     | SEC 150mg with loading dose ± MTX     | 114 | 16 | 41.2 | 22.8 |      |       | -0.98 |       | 3.42 |      |                   |
|                                        | SEC 150mg no loading dose ± MTX       | 113 |    | 39.8 | 16.8 |      |       | -0.84 |       | 3.44 |      |                   |
|                                        | Placebo ± MTX                         | 114 |    | 18.4 | 6.1  |      |       | -0.21 |       | 0.63 |      |                   |
| Mease 2018c (FUTURE-5) [13]            | SEC 300 mg with loading dose ± MTX    | 222 | 16 | 62.6 | 39.6 | 20.3 | -1.49 |       | -0.55 |      |      | 0.08              |
|                                        | SEC 150 mg with loading dose ± MTX    | 220 |    | 55.5 | 35.9 | 18.2 | -1.29 |       | -0.44 |      |      | 0.17              |
|                                        | SEC 150 mg without loading dose ± MTX | 222 |    | 59.5 | 32   | 14.9 | -1.29 |       | -0.45 |      |      | -0.09             |
|                                        | Placebo ± MTX                         | 332 |    | 27.4 | 8.1  | 4.2  | -0.63 |       | -0.21 |      |      | 0.5               |
| Deodhar 2018 (Guselkumab Phase 2) [14] | Placebo ± MTX                         | 49  | 24 | 18   | 10   | 2    |       |       | -0.06 | 0.46 |      |                   |
|                                        | Guselkumab 100 mg ± MTX               | 100 |    | 58   | 34   | 14   |       |       | -0.42 | 6.59 |      |                   |
| Mease 2017/2018 [15, 34]               | RKM 150 mg Q4W ± MTX                  | 42  | 16 | 57.1 | 23.8 | 14.3 |       |       | -0.18 |      | 28.6 | -0.3 <sup>a</sup> |
|                                        | RKM 150 mg wk 0, 4, 16 ± MTX          | 42  |    | 61.9 | 23.8 | 7.1  |       |       | -0.16 |      | 28.6 | 0.2 <sup>a</sup>  |
|                                        | RKM 150 mg wk 0, 12 ± MTX             | 39  |    | 59.0 | 38.5 | 25.6 |       |       | -0.25 |      | 33.3 | -0.5 <sup>a</sup> |
|                                        | RKM 75 mg wk 0 ± MTX                  | 20  |    | 65.0 | 25.0 | 15.0 |       |       | -0.16 |      | 35.0 | -0.2 <sup>a</sup> |
|                                        | Placebo ± MTX                         | 42  |    | 35.7 | 11.9 | 0    |       |       | -0.09 |      | 7.1  | 0.6 <sup>a</sup>  |
| Araujo 2018 (ECLIPSA) [16]             | UKM 45mg/90mg ± MTX                   | 23  | 24 |      |      |      |       |       |       |      | 77   |                   |
|                                        | TNFi ± MTX                            | 24  |    |      |      |      |       |       |       |      | 45   |                   |
| Gladman 2018 (PALACE 1-3) [17]         | PLC (enthesitis at BL)                | 311 | 24 |      |      |      |       |       |       |      |      |                   |
|                                        | APR 30 mg BID (enthesitis at BL)      | 327 |    |      |      |      |       |       |       |      |      |                   |
|                                        | APR 20mg BID (enthesitis at BL)       | 307 |    |      |      |      |       |       |       |      |      |                   |

|                                            |                                  |     |     |      |      |      |       |       |       |       |      |                   |
|--------------------------------------------|----------------------------------|-----|-----|------|------|------|-------|-------|-------|-------|------|-------------------|
|                                            | PLC (dactylitis at BL)           | 205 |     |      |      |      |       |       |       |       |      |                   |
|                                            | APR 30 mg BID (dactylitis at BL) | 221 |     |      |      |      |       |       |       |       |      |                   |
|                                            | APR 20mg BID (dactylitis at BL)  | 207 |     |      |      |      |       |       |       |       |      |                   |
| Cutolo 2016 (PALACE-2) [18]                | Placebo ± csDMARD                | 159 | 16  | 18.9 | 5    | 0.6  |       | 8.2   | -0.07 | 1.1   |      |                   |
|                                            | APR 20mg BID ± csDMARD           | 163 |     | 37.4 | 14.7 | 3.7  |       | 17.8  | -0.17 | 2.5   |      |                   |
|                                            | APR 30mg BID ± csDMARD           | 162 |     | 32.1 | 10.5 | 1.2  |       | 11.7  | -0.23 | 3.5   |      |                   |
| Edwards 2016 (PALACE-3) [19]               | Placebo ± csDMARD                | 169 | 16  | 18.3 | 8.3  | 2.4  |       | 8     | -0.07 |       |      |                   |
|                                            | APR 20mg BID ± csDMARD           | 169 |     | 28.4 | 12.4 | 4.7  |       | 17    | -0.13 |       |      |                   |
|                                            | APR 30mg BID ± csDMARD           | 167 |     | 40.7 | 15   | 3.6  |       | 18    | -0.2  |       |      |                   |
| Wells 2018 (PALACE-4) [20]                 | Placebo                          | 176 | 16  | 15.9 | 4.5  | 1.1  | 8.5   |       | 0.03  |       |      |                   |
|                                            | APR 20mg BID                     | 175 |     | 28   | 11.4 | 4    | 13.1  |       | -0.17 |       |      |                   |
|                                            | APR 30mg BID                     | 176 |     | 30.7 | 11.4 | 4    | 9.7   |       | -0.21 |       |      |                   |
| Nash 2018 (ACTIVE) [21]                    | Placebo                          | 109 | 16  | 20.2 | 4.6  | 0    | -0.39 |       | -0.06 | -0.31 |      |                   |
|                                            | APR 30mg BID                     | 110 |     | 38.2 | 18.2 | 6.4  | -1.07 |       | -0.21 | 4.03  |      |                   |
| Mease 2018 ACR (SEAM-PsA) [22]             | Placebo + MTX                    | 284 | 24  | 50.7 | 30.6 | 13.8 |       | -22.6 | -0.41 | 9.2   | 22.9 | 0.08              |
|                                            | ETA 50mg QW + Placebo            | 284 |     | 60.9 | 44.4 | 29.2 |       | -25   | -0.44 | 10.6  | 35.9 | -0.04             |
|                                            | ETA 50mg QW + MTX                | 283 |     | 64   | 45.7 | 27.7 |       | -24.9 | -0.47 | 11.3  | 35.7 | -0.01             |
| Kavanaugh 2017 (GO-VIBRANT) [23]           | Placebo i.v. ± MTX               | 239 | 14  | 21.8 | 6.3  | 2.1  |       |       | -0.12 | 1     | 4.2  | 2 <sup>a</sup>    |
|                                            | GLM 2mg/kg i.v. ± MTX            | 241 |     | 75.1 | 43.6 | 24.5 |       |       | -0.6  | 5.3   | 27   | -0.4 <sup>a</sup> |
| Van Der Heijde 2017 EULAR (RAPID-PsA) [24] | Placebo ± csDMARD                | 136 | 216 |      |      |      |       |       |       |       |      |                   |
|                                            | CZP 200mg Q2W ± csDMARD          | 138 |     |      |      |      |       |       |       |       |      | 0.7               |
|                                            | CZP 400mg Q4W ± csDMARD          | 135 |     |      |      |      |       |       |       |       |      | 0.7               |
| Mease 2018d (EQUATOR) [25]                 | Placebo ± csDMARD                | 66  | 16  | 33.3 | 15.2 | 6.1  |       | -27.9 | -0.28 |       |      |                   |
|                                            | FILGO 200mg OD ± csDMARD         | 65  |     | 80   | 47.7 | 23.1 |       | -18.1 | -0.57 |       |      |                   |
| Gladman 2017 (OPAL Beyond) [26]            | Placebo ± csDMARD                | 131 | 24  | 24   | 15   | 10   |       |       | -0.14 |       | 14.5 |                   |
|                                            | TOFA 5mg BID ± csDMARD           | 131 |     | 50   | 30   | 17   |       |       | -0.39 |       | 22.9 |                   |

|                                                                                                                                                                                                                                                                                                                                                                                                                                                                                                                                                                                                                                                                                                                                                                                                                                                                      |                         |     |    |    |    |    |      |  |       |     |      |                                              |
|----------------------------------------------------------------------------------------------------------------------------------------------------------------------------------------------------------------------------------------------------------------------------------------------------------------------------------------------------------------------------------------------------------------------------------------------------------------------------------------------------------------------------------------------------------------------------------------------------------------------------------------------------------------------------------------------------------------------------------------------------------------------------------------------------------------------------------------------------------------------|-------------------------|-----|----|----|----|----|------|--|-------|-----|------|----------------------------------------------|
|                                                                                                                                                                                                                                                                                                                                                                                                                                                                                                                                                                                                                                                                                                                                                                                                                                                                      | TOFA 10mg BID ± csDMARD | 132 |    | 47 | 28 | 14 |      |  | -0.35 |     | 21.2 |                                              |
| Mease 2017c<br>(OPAL Broaden)<br>[27]                                                                                                                                                                                                                                                                                                                                                                                                                                                                                                                                                                                                                                                                                                                                                                                                                                | Placebo ± csDMARD       | 105 | 12 | 33 | 10 | 5  | -0.8 |  | -0.18 | 2.1 | 7    | 0.00 <sup>b,c</sup> /<br>0.09 <sup>b,d</sup> |
|                                                                                                                                                                                                                                                                                                                                                                                                                                                                                                                                                                                                                                                                                                                                                                                                                                                                      | TOFA 5mg BID ± csDMARD  | 107 |    | 50 | 28 | 17 | -1.3 |  | -0.35 | 5.2 | 26   | 0.01 <sup>b</sup>                            |
|                                                                                                                                                                                                                                                                                                                                                                                                                                                                                                                                                                                                                                                                                                                                                                                                                                                                      | TOFA 10mg BID ± csDMARD | 104 |    | 61 | 40 | 14 | -1.6 |  | -0.4  | 5.2 | 26   | -0.01 <sup>b</sup>                           |
|                                                                                                                                                                                                                                                                                                                                                                                                                                                                                                                                                                                                                                                                                                                                                                                                                                                                      | ADA 40mg Q2W ± csDMARD  | 106 |    | 52 | 33 | 19 | -1.5 |  | -0.38 | 5.2 | 25   | -0.07 <sup>b</sup>                           |
| <sup>a</sup> week 24; <sup>b</sup> week 52; <sup>c</sup> Placebo advancing to TOFA 5mg BID; <sup>d</sup> Placebo advancing to TOFA 10mg BID; ABA: abatacept; ACR: American College of Rheumatology response; ADA: adalimumab; APR: apremilast; bDMARD: biological disease modifying drug; BID: twice daily; BL: baseline; CKM: clazakizumab; CRP: C-reactive protein; csDMARD: conventional synthetic disease modifying drug; CZP: certolizumab pegol; DAPSA: Disease Activity Index for Psoriatic Arthritis; DAS28-CRP: Disease Activity Score using 28-joint count assessment and CRP; ETA: etanercept; FILGO: filgotinib; GLM: golimumab; GKM: guselkumab; IXE: ixekizumab; MDA: minimal disease activity; mTSS: PsA modified total Sharp score; MTX: methotrexate; QNW: every N weeks; RKM: risankizumab; SEC: secukinumab; TOFA: tofacitinib; UKM: ustekinumab; |                         |     |    |    |    |    |      |  |       |     |      |                                              |

Table S3.2: Efficacy outcomes: Extra-articular efficacy outcomes of trials investigating bDMARDs.

| Study                                 | Treatment                   | No. of patients (n) | Timepoint (weeks) | PASI 50 (%) | PASI 75 (%) | PASI 90 (%) | PASI 100 (%) | ΔPASI | Resolution of dactylitis (%) | Resolution of enthesitis (%) |
|---------------------------------------|-----------------------------|---------------------|-------------------|-------------|-------------|-------------|--------------|-------|------------------------------|------------------------------|
| Mease 2017a (ASTRAEA) [1]             | ABA +/- MTX                 | 213                 | 24                | 26.7        | 16.4        |             |              |       | 44.3                         | 32.9                         |
|                                       | Placebo +/- MTX             | 211                 |                   | 19.6        | 10.1        |             |              |       | 34                           | 21.2                         |
| Mease 2018a (ABT-122 Phase 2) [2]     | Placebo + MTX               | 24                  | 12                |             | 27          | 18          |              |       |                              |                              |
|                                       | ADA 40mg Q2W + MTX          | 72                  |                   |             | 57.6        | 46          |              |       |                              |                              |
|                                       | ABT-122 120mg Q2W           | 71                  |                   |             | 74.4        | 49          |              |       |                              |                              |
|                                       | ABT-122 240mg Q2W           | 73                  |                   |             | 77.6        | 47          |              |       |                              |                              |
| Mease 2016 (Clazakizumab Phase 2) [3] | Placebo ± MTX               | 41                  | 16                | 36.6        | 14.6        |             |              |       |                              |                              |
|                                       | CKM 25 mg ± MTX             | 41                  |                   | 34.1        | 12.2        |             |              |       |                              |                              |
|                                       | CKM 100 mg ± MTX            | 42                  |                   | 31          | 16.7        |             |              |       |                              |                              |
|                                       | CKM 200 mg ± MTX            | 41                  |                   | 19.5        | 4.9         |             |              |       |                              |                              |
| Mease 2017b (SPIRIT-P1) [4]           | Placebo ± csDMARD           | 106                 | 24                |             | 10.4        | 6           | 3            |       | 25                           | 19.3                         |
|                                       | IXE 80mg Q4W ± csDMARD      | 107                 |                   |             | 71.2        | 56.2        | 42.5         |       | 79.5                         | 42.6                         |
|                                       | IXE 80mg Q2W ± csDMARD      | 103                 |                   |             | 79.7        | 67.8        | 52.5         |       | 76.9                         | 38.6                         |
|                                       | ADA 40mg Q2W ± csDMARD      | 101                 |                   |             | 54.4        | 36.8        | 23.5         |       | 77.8                         | 33.3                         |
| Nash 2017 (SPIRIT-P2) [7]             | Placebo ± csDMARD           | 118                 | 24                |             | 8.5         | 6.8         | 2.5          |       | 2.5                          | 12.7                         |
|                                       | IXE 80mg Q4W ± csDMARD      | 122                 |                   |             | 31.1        | 24.6        | 19.7         |       | 17.2                         | 19.7                         |
|                                       | IXE 80mg Q2W ± csDMARD      | 123                 |                   |             | 33.3        | 27.6        | 15.4         |       | 8.1                          | 21.1                         |
| Kavanaugh 2016 (FUTURE-2) [10]        | SEC 300mg (TNF-naïve) ± MTX | 67                  | 24                |             | 63.3        | 53.3        |              |       | 54.8                         | 45.9                         |
|                                       | SEC 150mg (TNF-naïve) ± MTX | 63                  |                   |             | 55.6        | 38.9        |              |       | 57.1                         | 45.9                         |
|                                       | SEC 75mg (TNF-naïve) ± MTX  | 65                  |                   |             | 30.3        | 12.1        |              |       | 30.8                         | 35.6                         |
|                                       | Placebo (TNF-naïve) ± MTX   | 63                  |                   |             | 19.4        | 9.7         |              |       | 17.6                         | 28.6                         |

|                                        |                                       |     |    |    |      |      |      |  |      |      |
|----------------------------------------|---------------------------------------|-----|----|----|------|------|------|--|------|------|
|                                        | SEC 300mg (TNF-exposed) ± MTX         | 33  |    |    | 63.6 | 36.4 |      |  | 60.0 | 52.6 |
|                                        | SEC 150mg (TNF-exposed) ± MTX         | 37  |    |    | 36.4 | 22.7 |      |  | 36.4 | 37.0 |
|                                        | SEC 75mg (TNF-exposed) ± MTX          | 34  |    |    | 23.5 | 11.8 |      |  | 28.6 | 26.1 |
|                                        | Placebo (TNF-exposed) ± MTX           | 35  |    |    | 8.3  | 8.3  |      |  | 10.0 | 8.7  |
| Nash 2018 (FUTURE-3) [11]              | SEC 300mg ± MTX                       | 139 | 24 |    | 46.8 | 33.9 |      |  | 47.8 | 39.8 |
|                                        | SEC 150mg ± MTX                       | 138 |    |    | 50   | 36.8 |      |  | 38.9 | 36.8 |
|                                        | Placebo ± MTX                         | 137 |    |    | 10.2 | 6.8  |      |  | 13.9 | 15.3 |
| Kivitz PANLAR 2018 (FUTURE-4) [12]     | SEC 150mg with loading dose ± MTX     | 114 | 16 |    | 52.7 |      |      |  |      |      |
|                                        | SEC 150mg no loading dose ± MTX       | 113 |    |    | 50   |      |      |  |      |      |
|                                        | Placebo ± MTX                         | 114 |    |    | 8.1  |      |      |  |      |      |
| Mease 2018c (FUTURE-5) [13]            | SEC 300 mg with loading dose ± MTX    | 222 | 16 |    | 70   | 53.6 |      |  | 65.9 | 55.7 |
|                                        | SEC 150 mg with loading dose ± MTX    | 220 |    |    | 60   | 36.8 |      |  | 57.5 | 54.6 |
|                                        | SEC 150 mg without loading dose ± MTX | 222 |    |    | 58.1 | 31.6 |      |  | 56.3 | 41.9 |
|                                        | Placebo ± MTX                         | 332 |    |    | 12.3 | 9.3  |      |  | 32.3 | 35.4 |
| Deodhar 2018 (Guselkumab Phase 2) [14] | Placebo ± MTX                         | 49  | 24 | 29 | 13   | 6    | 6    |  | 17   | 29   |
|                                        | GKM 100 mg ± MTX                      | 100 |    | 87 | 79   | 66   | 40   |  | 55   | 57   |
| Mease 2017/2018 [15, 34]               | RKM 150 mg Q4W ± MTX                  | 42  | 16 |    | 75.0 | 58.3 | 33.3 |  |      |      |
|                                        | RKM 150 mg wk 0, 4, 16 ± MTX          | 42  |    |    | 70.0 | 66.7 | 52.2 |  |      |      |
|                                        | RKM 150 mg wk 0, 12 ± MTX             | 39  |    |    | 73.9 | 52.2 | 34.8 |  |      |      |
|                                        | RKM 75 mg wk 0 ± MTX                  | 20  |    |    | 66.7 | 55.6 | 55.6 |  |      |      |
|                                        | Placebo ± MTX                         | 42  |    |    | 9.5  | 9.5  | 9.5  |  |      |      |
| Araujo 2018                            | UKM 45mg/90mg ± MTX                   | 23  | 24 |    |      | 86   | 59   |  |      | 77   |

|                                     |                                  |     |    |      |      |      |      |  |      |      |
|-------------------------------------|----------------------------------|-----|----|------|------|------|------|--|------|------|
| (ECLIPSA) [16]                      | TNFi ± MTX                       | 24  |    |      |      | 29   | 29   |  |      | 29   |
| Gladman 2018<br>(PALACE 1-3) [17]   | PLC (enthesitis at BL)           | 311 | 24 |      |      |      |      |  |      | 22.5 |
|                                     | APR 30 mg BID (enthesitis at BL) | 327 |    |      |      |      |      |  |      | 27.5 |
|                                     | APR 20mg BID (enthesitis at BL)  | 307 |    |      |      |      |      |  |      | 27.4 |
|                                     | PLC (dactylitis at BL)           | 205 |    |      |      |      |      |  | 39   |      |
|                                     | APR 30 mg BID (dactylitis at BL) | 221 |    |      |      |      |      |  | 46.2 |      |
|                                     | APR 20mg BID (dactylitis at BL)  | 207 |    |      |      |      |      |  | 45.9 |      |
| Cutolo 2016<br>(PALACE-2) [18]      | Placebo ± csDMARD                | 159 | 16 | 13.5 | 2.7  |      |      |  |      |      |
|                                     | APR 20mg BID ± csDMARD           | 163 |    | 33.8 | 18.8 |      |      |  |      |      |
|                                     | APR 20mg BID ± csDMARD           | 162 |    | 41.6 | 22.1 |      |      |  |      |      |
| Edwards 2016<br>(PALACE-3) [19]     | Placebo ± csDMARD                | 169 | 16 | 24   | 8    |      |      |  |      |      |
|                                     | APR 20mg BID ± csDMARD           | 169 |    | 33   | 20   |      |      |  |      |      |
|                                     | APR 20mg BID ± csDMARD           | 167 |    | 41   | 21   |      |      |  |      |      |
| Wells 2018<br>(PALACE-4) [20]       | Placebo                          | 176 | 16 | 19.4 | 10.8 |      |      |  | 31.1 | 19.1 |
|                                     | APR 20mg BID                     | 175 |    | 44.2 | 17.3 |      |      |  | 40.4 | 21.4 |
|                                     | APR 30mg BID                     | 176 |    | 45.9 | 25.7 |      |      |  | 40.5 | 35.1 |
| Nash 2018 (ACTIVE)<br>[21]          | Placebo                          | 109 |    |      |      |      |      |  |      | 33.3 |
|                                     | APR 30mg BID                     | 110 |    |      |      |      |      |  |      | 46.4 |
| Mease 2018 ACR<br>(SEAM-PsA) [22]   | Placebo + MTX                    | 284 | 24 |      |      |      |      |  | 65.2 | 43.1 |
|                                     | ETA 50mg QW + Placebo            | 284 |    |      |      |      |      |  | 76.4 | 52.6 |
|                                     | ETA 50mg QW + MTX                | 283 |    |      |      |      |      |  | 79.3 | 47.5 |
| Kavanaugh 2017<br>(GO-VIBRANT) [23] | Placebo i.v. ± MTX               | 239 | 14 |      | 13.6 | 6.6  | 4.5  |  |      |      |
|                                     | GLM 2mg/kg i.v. ± MTX            | 241 |    |      | 59.2 | 39.3 | 16.8 |  |      |      |
| Mease 2018d<br>(EQUATOR) [25]       | Placebo ± csDMARD                | 66  | 16 |      | 15   |      |      |  |      |      |
|                                     | FILGO 200mg OD ± csDMARD         | 65  |    |      | 45.2 |      |      |  |      |      |
| Gladman 2017                        | Placebo ± csDMARD                | 131 | 24 |      | 14   |      |      |  | 28.6 | 21.5 |

|                                                                                                                                                                                                                                                                                                                                                                                                                                                                                                                                                           |                         |     |    |  |    |  |  |  |      |      |
|-----------------------------------------------------------------------------------------------------------------------------------------------------------------------------------------------------------------------------------------------------------------------------------------------------------------------------------------------------------------------------------------------------------------------------------------------------------------------------------------------------------------------------------------------------------|-------------------------|-----|----|--|----|--|--|--|------|------|
| (OPAL Beyond) [26]                                                                                                                                                                                                                                                                                                                                                                                                                                                                                                                                        | TOFA 5mg BID ± csDMARD  | 131 |    |  | 21 |  |  |  | 51.5 | 39.8 |
|                                                                                                                                                                                                                                                                                                                                                                                                                                                                                                                                                           | TOFA 10mg BID ± csDMARD | 132 |    |  | 43 |  |  |  | 50.8 | 32.3 |
| Mease 2017c<br>(OPAL Broaden)<br>[27]                                                                                                                                                                                                                                                                                                                                                                                                                                                                                                                     | Placebo ± csDMARD       | 105 | 12 |  | 15 |  |  |  | 32.8 | 21.5 |
|                                                                                                                                                                                                                                                                                                                                                                                                                                                                                                                                                           | TOFA 5mg BID ± csDMARD  | 107 |    |  | 43 |  |  |  | 34.4 | 33.3 |
|                                                                                                                                                                                                                                                                                                                                                                                                                                                                                                                                                           | TOFA 10mg BID ± csDMARD | 104 |    |  | 44 |  |  |  | 60   | 40.6 |
|                                                                                                                                                                                                                                                                                                                                                                                                                                                                                                                                                           | ADA 40mg Q2W ± csDMARD  | 106 |    |  | 39 |  |  |  | 46.6 | 47.4 |
| ABA: abatacept; ACR: American College of Rheumatology response; ADA: adalimumab; APR: apremilast; bDMARD: biological disease modifying drug; BID: twice daily; BL: baseline; CKM: clazakizumab; CRP: C-reactive protein; csDMARD: conventional synthetic disease modifying drug; CZP: certolizumab pegol; ETA: etanercept; FILGO: filgotinib; GLM: golimumab; GKM: guselkumab; IXE: ixekizumab; MTX: methotrexate; PASI: Psoriasis Area and Severity Index; QNW: every N weeks; RKM: risankizumab; SEC: secukinumab; TOFA: tofacitinib; UKM: ustekinumab; |                         |     |    |  |    |  |  |  |      |      |

## Section 4: Safety study characteristics of articles and abstracts included.



Table S4.1: Safety: Details of articles and abstracts selected for inclusion.

| Study                | Type                | Outcome               | Exposure                                      | Control                               |
|----------------------|---------------------|-----------------------|-----------------------------------------------|---------------------------------------|
| Choquette 2015       | Cohort study        | Infusion reactions    | Infliximab + premedication                    | Infliximab without premedication      |
| Li 2015              | Case-control study  | Cardiovascular events | DMARDs therapy / steroids                     | No DMARD                              |
| Ogdie 2015           | Cohort study        | Cardiovascular events | DMARD                                         | No DMARD                              |
| Polachek 2015        | Cohort study        | Vaccination           | Biologic DMARD therapy                        | csDMARD therapy                       |
| Costa 2016           | Cohort study        | Malignancies          | Biologic DMARD therapy                        | csDMARD therapy                       |
| Eder 2016            | Cohort study        | Cardiovascular events | TNF inhibitor / MTX / other DMARDs / steroids | No DMARD                              |
| Haddad 2016          | Cohort study        | Infections            | Biologic DMARD therapy                        | Non biologic DMARD therapy            |
| Dreyer 2016          | Cohort study        | Multiple sclerosis    | TNF inhibitor                                 | Not receiving TNF inhibitor           |
| Zisman 2016          | Cohort study        | Herpes zoster         | TNF inhibitors / csDMARDs / steroids          | Not receiving csDMARD / TNF inhibitor |
| Hellgren 2017        | Cohort study        | Malignancies          | TNF inhibitors                                | TNF naïve                             |
| Mariette 2015        | Long term extension | Tuberculosis          | Certolizumab pegol                            | None                                  |
| Kavanaugh 2015       | Long term extension | Clinical trial safety | Apremilast                                    | None                                  |
| Kavanaugh 2015       | Long term extension | Clinical trial safety | Ustekinumab                                   | None                                  |
| Mease 2018           | Long term extension | Clinical trial safety | Secukinumab                                   | None                                  |
| van der Heijde 2018  | Long term extension | Clinical trial safety | Certolizumab                                  | None                                  |
| Walsh 2018           | Long term extension | Clinical trial safety | Certolizumab                                  | None                                  |
| Genovese 2015        | Long term extension | Clinical trial safety | Brodalumab                                    | None                                  |
| McInnes 2017         | Long term extension | Clinical trial safety | Secukinumab                                   | None                                  |
| Chandran 2018        | Long term extension | Clinical trial safety | Ixekizumab                                    | None                                  |
| Orbai ACR 2018       | Long term extension | Clinical trial safety | Ixekizumab                                    | None                                  |
| Mease EULAR 2018     | Long term extension | Clinical trial safety | Tofacitinib                                   | None                                  |
| Burmester EULAR 2018 | Long term extension | Clinical trial safety | Tofacitinib                                   | None                                  |
| Kavanaugh 2019       | Long term extension | Clinical trial safety | Apremilast                                    | None                                  |

Cs: conventional synthetic; DMARD: disease modifying anti-rheumatic drug; MTX: methotrexate; TNF: Tumor necrosis factor;

## Table S4.2: Safety: Risk of Bias analysis

Table 4.2.1: Newcastle Ottawa scale for cohort studies

| Type of bias                                                                                                                                                                                  | Category                                                                 | Assessment                                                                    |
|-----------------------------------------------------------------------------------------------------------------------------------------------------------------------------------------------|--------------------------------------------------------------------------|-------------------------------------------------------------------------------|
| <b>Selection bias</b>                                                                                                                                                                         | Representativeness of the exposed cohort                                 | representative* / selected group / no description                             |
|                                                                                                                                                                                               | Selection of the non-exposed cohort                                      | same cohort as exposed* / different source / no description                   |
|                                                                                                                                                                                               | Ascertainment of exposure                                                | secure record* / structured interview* / written self-report / no description |
|                                                                                                                                                                                               | Demonstration that outcome of interest was not present at start of study | yes* / no                                                                     |
| <b>Comparability of cohorts (design/analysis)</b>                                                                                                                                             | Study controls for most important factor                                 | yes* / no                                                                     |
|                                                                                                                                                                                               | Study controls for any additional factor                                 | yes* / no                                                                     |
| <b>Outcome</b>                                                                                                                                                                                | Assessment of outcome                                                    | blinded* / record linkage* / self-report / not described                      |
|                                                                                                                                                                                               | Follow up long enough for outcomes to occur                              | yes* / no                                                                     |
|                                                                                                                                                                                               | Adequacy of follow up of cohorts                                         | complete* / lost to follow up / not stated                                    |
| Each category can be rated with a star (*), based on the respective assessment. This leads to a possible maximum of 4 stars for selection, 2 stars for comparability and 3 stars for outcome. |                                                                          |                                                                               |

Table 4.2.2: Newcastle Ottawa scale for case-control studies

| Type of bias                                                                                                                                                                                   | Category                                            | Assessment                                                                                                                             |
|------------------------------------------------------------------------------------------------------------------------------------------------------------------------------------------------|-----------------------------------------------------|----------------------------------------------------------------------------------------------------------------------------------------|
| <b>Selection bias</b>                                                                                                                                                                          | Case definition adequate?                           | Yes, with independent validation * / yes (record linkage, self-reports) / no description                                               |
|                                                                                                                                                                                                | Representativeness of the cases                     | Consecutive and representative series of cases * / potential selection bias / not stated                                               |
|                                                                                                                                                                                                | Selection of controls                               | Community controls * / hospital controls / no description                                                                              |
|                                                                                                                                                                                                | Definition of controls                              | No history of endpoint * / no description                                                                                              |
| <b>Comparability of cases and controls (design/analysis)</b>                                                                                                                                   | Study controls for most important factor            | yes* / no                                                                                                                              |
|                                                                                                                                                                                                | Study controls for any additional factor            | yes* / no                                                                                                                              |
| <b>Exposure</b>                                                                                                                                                                                | Ascertainment of exposure                           | Secure record * / structured blinded interview * / non-blinded interview / written self report or medical record only / no description |
|                                                                                                                                                                                                | Same method of ascertainment for cases and controls | yes* / no                                                                                                                              |
|                                                                                                                                                                                                | Non-response rate                                   | Same rate for both groups * / non respondents described / rate different and no designation                                            |
| Each category can be rated with a star (*), based on the respective assessment. This leads to a possible maximum of 4 stars for selection, 2 stars for comparability and 3 stars for exposure. |                                                     |                                                                                                                                        |

Table 4.2.3: Risk of bias analysis of cohort studies

| Study          | Selection bias                           |                                     |                           |                                                                          | Comparability of cohorts (design/analysis) |                                          | Outcome               |                                             |                                  |
|----------------|------------------------------------------|-------------------------------------|---------------------------|--------------------------------------------------------------------------|--------------------------------------------|------------------------------------------|-----------------------|---------------------------------------------|----------------------------------|
|                | Representativeness of the exposed cohort | Selection of the non-exposed cohort | Ascertainment of exposure | Demonstration that outcome of interest was not present at start of study | Study controls for most important factor   | Study controls for any additional factor | Assessment of outcome | Follow-up long enough for outcomes to occur | Adequacy of follow up of cohorts |
| Choquette 2015 | *                                        | *                                   | *                         | *                                                                        | *                                          | *                                        | *                     | *                                           | *                                |
| Ogdie 2015     | *                                        | *                                   |                           | *                                                                        | *                                          | *                                        | *                     | *                                           | *                                |
| Polachek 2015  | *                                        |                                     | *                         | *                                                                        | *                                          | *                                        | *                     | *                                           | *                                |
| Costa 2016     | *                                        | *                                   | *                         | *                                                                        | *                                          | *                                        |                       | *                                           |                                  |
| Eder 2016      | *                                        | *                                   | *                         | *                                                                        | *                                          | *                                        | *                     | *                                           |                                  |
| Haddad 2016    | *                                        | *                                   | *                         |                                                                          | *                                          | *                                        | *                     |                                             | *                                |
| Dreyer 2016    | *                                        | *                                   | *                         | *                                                                        | *                                          |                                          | *                     | *                                           | *                                |
| Zisman 2016    | *                                        | *                                   |                           |                                                                          | *                                          | *                                        | *                     | *                                           | *                                |
| Hellgren 2017  | *                                        | *                                   | *                         | *                                                                        | *                                          |                                          | *                     | *                                           | *                                |

Each category can be rated with a star (\*), based on the respective assessment. This leads to a possible maximum of 4 stars for selection, 2 stars for comparability and 3 stars for exposure.

Table 4.2.4: Risk of bias analysis of case-control studies

| Study                                                                                                                                                                                          | Selection bias            |                                 |                       |                        | Comparability of cases and controls (design/analysis) |                                          | Exposure                  |                                                     |                   |
|------------------------------------------------------------------------------------------------------------------------------------------------------------------------------------------------|---------------------------|---------------------------------|-----------------------|------------------------|-------------------------------------------------------|------------------------------------------|---------------------------|-----------------------------------------------------|-------------------|
|                                                                                                                                                                                                | Case definition adequate? | Representativeness of the cases | Selection of controls | Definition of controls | Study controls for most important factor              | Study controls for any additional factor | Ascertainment of exposure | Same method of ascertainment for cases and controls | Non-response rate |
| Li 2015                                                                                                                                                                                        |                           | *                               | *                     | *                      | *                                                     | *                                        |                           | *                                                   |                   |
| Each category can be rated with a star (*), based on the respective assessment. This leads to a possible maximum of 4 stars for selection, 2 stars for comparability and 3 stars for exposure. |                           |                                 |                       |                        |                                                       |                                          |                           |                                                     |                   |

Table S4.3: Safety: Baseline characteristics of cohort and case control studies.

| Study          | Cohort                    | No. of patients (n) | Mean age (years) | Mean PsO disease duration (years) | Mean PsA disease duration (years) | Female (%) | BMI (kg/m <sup>2</sup> ) |
|----------------|---------------------------|---------------------|------------------|-----------------------------------|-----------------------------------|------------|--------------------------|
| Choquette 2015 | Overall                   | 89                  | 49.0             |                                   |                                   | 46.1       |                          |
| Ogdie 2015     | No DMARD                  | 4174                | 51.63            |                                   | 5.75                              |            |                          |
|                | DMARD                     | 4532                | 49.80            |                                   | 4.39                              |            |                          |
| Polachek 2015  | PsA patients              | 67                  | 50.0             | 14.5                              | 8                                 |            |                          |
|                | Control                   | 30                  | 43.3             |                                   |                                   |            |                          |
| Costa 2016     | DMARD                     | 322                 | 57.2             |                                   |                                   | 62         |                          |
|                | TNF inhibitor             | 296                 | 47.5             |                                   |                                   | 60         |                          |
| Eder 2016      | Overall                   | 1091                | 43.8             | 15.17                             | 5.65                              | 43.9       |                          |
| Haddad 2016    | Overall                   | 695                 | 49.5             | 21.5                              | 12.5                              | 42         | 29.3                     |
| Dreyer 2016    | TNF inhibitor experienced | 1603                |                  |                                   |                                   | 53         |                          |
|                | TNF inhibitor naïve       | 2286                |                  |                                   |                                   | 57         |                          |
| Zisman 2016    | Overall                   | 3128                | 50.26            |                                   |                                   | 53.8       |                          |
| Hellgren 2017  | TNF inhibitor             | 3833                |                  |                                   |                                   |            |                          |
|                | TNF naïve                 | 15908               |                  |                                   |                                   |            |                          |
| Li 2015        | PsA (CVD)                 | 7982                | 46.1             |                                   | 7.7                               | 50.68      |                          |
|                | PsA (MACE)                | 8454                | 47.0             |                                   | 7.6                               | 50.63      |                          |

BMI: body mass index; CVD: cardiovascular disease; DMARD: disease modifying anti-rheumatic drug; MACE: major adverse cardiovascular events; PsA: psoriasis arthritis; Pso: psoriasis; TNF: tumor necrosis factor;

## Section 4: References

1. Mease PJ, Gottlieb AB, van der Heijde D, FitzGerald O, Johnsen A, Nys M, et al. Efficacy and safety of abatacept, a T-cell modulator, in a randomised, double-blind, placebo-controlled, phase III study in psoriatic arthritis. *Annals of the Rheumatic Diseases*. 2017 Sep; 76(9):1550-1558.
2. Mease PJ, Genovese MC, Weinblatt ME, Peloso PM, Chen K, Othman AA, et al. Phase II Study of ABT-122, a Tumor Necrosis Factor- and Interleukin-17A-Targeted Dual Variable Domain Immunoglobulin, in Patients With Psoriatic Arthritis With an Inadequate Response to Methotrexate. *Arthritis rheumatol*. 2018 Nov; 70(11):1778-1789.
3. Mease PJ, Gottlieb AB, Berman A, Drescher E, Xing J, Wong R, et al. The Efficacy and Safety of Clazakizumab, an Anti-Interleukin-6 Monoclonal Antibody, in a Phase IIb Study of Adults With Active Psoriatic Arthritis. *Arthritis rheumatol*. 2016 09; 68(9):2163-2173.
4. Mease PJ, van der Heijde D, Ritchlin CT, Okada M, Cuchacovich RS, Shuler CL, et al. Ixekizumab, an interleukin-17A specific monoclonal antibody, for the treatment of biologic-naïve patients with active psoriatic arthritis: results from the 24-week randomised, double-blind, placebo-controlled and active (adalimumab)-controlled period of the phase III trial SPIRIT-P1. *Annals of the Rheumatic Diseases*. 2017 Jan; 76(1):79-87.
5. Van Der Heijde D, Okada M, Lee C, Shuler CL, Rathmann S, Lin CY, et al. Radiographic progression of structural joint damage in patients with active psoriatic arthritis treated with ixekizumab over 52 weeks. *Annals of the rheumatic diseases Conference: annual european congress of rheumatology, EULAR 2017 Spain*. 2017; 76(Supplement 2):144-145.
6. Coates LC, Kishimoto M, Gottlieb A, Shuler CL, Lin CY, Lee CH, et al. Ixekizumab efficacy and safety with and without concomitant conventional disease-modifying antirheumatic drugs (cDMARDs) in biologic DMARD (bDMARD)-naïve patients with active psoriatic arthritis (PsA): results from SPIRIT-P1. *RMD Open*. 2017; 3(2):e000567.
7. Nash P, Kirkham B, Okada M, Rahman P, Combe B, Burmester GR, et al. Ixekizumab for the treatment of patients with active psoriatic arthritis and an inadequate response to tumour necrosis factor inhibitors: results from the 24-week randomised, double-blind, placebo-controlled period of the SPIRIT-P2 phase 3 trial. *Lancet*. 2017 06 10; 389(10086):2317-2327.
8. Nash P, Behrens F, Orbai AM, Rathmann SS, Adams DH, Benichou O, et al. Ixekizumab is efficacious when used alone or when added to conventional synthetic disease-modifying antirheumatic drugs (cDMARDs) in patients with active psoriatic arthritis and previous inadequate response or intolerance to tumour necrosis factor inhibitors. *RMD Open*. 2018; 4(2):e000692.
9. van der Heijde D, Landewe RB, Mease PJ, McInnes IB, Conaghan PG, Pricop L, et al. Brief Report: Secukinumab Provides Significant and Sustained Inhibition of Joint Structural Damage in a Phase III Study of Active Psoriatic Arthritis. *Arthritis rheumatol*. 2016 Aug; 68(8):1914-1921.
10. Kavanaugh A, McInnes IB, Mease PJ, Hall S, Chinoy H, Kivitz AJ, et al. Efficacy of Subcutaneous Secukinumab in Patients with Active Psoriatic Arthritis Stratified by Prior Tumor Necrosis Factor Inhibitor Use: Results from the Randomized Placebo-controlled FUTURE 2 Study. *Journal of Rheumatology*. 2016 09; 43(9):1713-1717.
11. Nash P, Mease PJ, McInnes IB, Rahman P, Ritchlin CT, Blanco R, et al. Efficacy and safety of secukinumab administration by autoinjector in patients with psoriatic arthritis: results from a randomized, placebo-controlled trial (FUTURE 3). *Arthritis Res Ther*. 2018 Mar 15; 20(1):47.
12. Kivitz A, Nash P, Tahir H, Everding A, Pellet P, Widmer A, et al. Arthritis: primary results through 52weeks from a phase-3 randomized placebo-controlled study (future 4). *Journal of clinical rheumatology Conference: 20th pan-american league of associations of rheumatology congress, PANLAR 2018 Argentina*. 2018; 24(3 Supplement 1):S1-S2.

13. Mease P, van der Heijde D, Landewe R, Mpfu S, Rahman P, Tahir H, et al. Secukinumab improves active psoriatic arthritis symptoms and inhibits radiographic progression: primary results from the randomised, double-blind, phase III FUTURE 5 study. *Annals of the Rheumatic Diseases*. 2018 Jun; 77(6):890-897.
14. Deodhar A, Gottlieb AB, Boehncke WH, Dong B, Wang Y, Zhuang Y, et al. Efficacy and safety of guselkumab in patients with active psoriatic arthritis: a randomised, double-blind, placebo-controlled, phase 2 study. *Lancet*. 2018 06 02; 391(10136):2213-2224.
15. Mease P, Kellner H, Morita A, Kivitz A, Papp K, Aslanyan S. Efficacy and safety results from a phase 2 trial of risankizumab, a selective IL-23p19 inhibitor, in patients with active psoriatic arthritis. *Arthritis rheumatol*. 2017; 69(10).
16. Araujo EG, Englbrecht M, Hoepken S, Finzel S, Kampylafka E, Kleyer A, et al. Effects of ustekinumab versus tumor necrosis factor inhibition on enthesitis: Results from the enthesial clearance in psoriatic arthritis (ECLIPSA) study. *Seminars in Arthritis and Rheumatism*. 2018.
17. Gladman DD, Kavanaugh A, Gomez-Reino JJ, Wollenhaupt J, Cutolo M, Schett G, et al. Therapeutic benefit of apremilast on enthesitis and dactylitis in patients with psoriatic arthritis: a pooled analysis of the PALACE 1-3 studies. *RMD Open*. 2018; 4(1):e000669.
18. Cutolo M, Myerson GE, Fleischmann RM, Liote F, Diaz-Gonzalez F, Van den Bosch F, et al. A Phase III, Randomized, Controlled Trial of Apremilast in Patients with Psoriatic Arthritis: Results of the PALACE 2 Trial. *Journal of Rheumatology*. 2016 09; 43(9):1724-1734.
19. Edwards CJ, Blanco FJ, Crowley J, Birbara CA, Jaworski J, Aelion J, et al. Apremilast, an oral phosphodiesterase 4 inhibitor, in patients with psoriatic arthritis and current skin involvement: a phase III, randomised, controlled trial (PALACE 3). *Annals of the Rheumatic Diseases*. 2016 Jun; 75(6):1065-1073.
20. Wells AF, Edwards CJ, Kivitz AJ, Bird P, Nguyen D, Paris M, et al. Apremilast monotherapy in DMARD-naive psoriatic arthritis patients: Results of the randomized, placebocontrolled PALACE 4 trial. *Rheumatology (United Kingdom)*. 2018; 57(7):1253-1263.
21. Nash P, Ohson K, Walsh J, Delev N, Nguyen D, Teng L, et al. Early and sustained efficacy with apremilast monotherapy in biological-naive patients with psoriatic arthritis: a phase IIIB, randomised controlled trial (ACTIVE). *Annals of the Rheumatic Diseases*. 2018 May; 77(5):690-698.
22. Mease PJ, Gladman DD, Collier DH, Ritchlin CT, Helliwell PS, Liu L, et al. Etanercept and Methotrexate as Monotherapy or in Combination for Psoriatic Arthritis: Primary Results From a Randomized, Controlled Phase III Trial. *Arthritis rheumatol*. 2019 Jul; 71(7):1112-1124.
23. Kavanaugh A, Husni ME, Harrison DD, Kim L, Lo KH, Leu JH, et al. Safety and Efficacy of Intravenous Golumumab in Patients With Active Psoriatic Arthritis: Results Through Week Twenty-Four of the GO-VIBRANT Study. *Arthritis rheumatol*. 2017 11; 69(11):2151-2161.
24. Van Der Heijde D, Fleischmann R, Wollenhaupt J, Deodhar A, Bauer L, Hoepken B, et al. The effect of certolizumab pegol on radiographic progression over 4 years of treatment in patients with psoriatic arthritis. *Annals of the rheumatic diseases Conference: annual european congress of rheumatology, EULAR 2017 Spain*. 2017; 76(Supplement 2):1316.
25. Mease P, Coates LC, Helliwell PS, Stanislavchuk M, Rychlewska-Hanczewska A, Dudek A, et al. Efficacy and safety of filgotinib, a selective Janus kinase 1 inhibitor, in patients with active psoriatic arthritis (EQUATOR): results from a randomised, placebo-controlled, phase 2 trial. *Lancet*. 2018 Dec 01; 392(10162):2367-2377.
26. Gladman D, Rigby W, Azevedo VF, Behrens F, Blanco R, Kaszuba A, et al. Tofacitinib for Psoriatic Arthritis in Patients with an Inadequate Response to TNF Inhibitors. *N Engl J Med*. 2017 10 19; 377(16):1525-1536.
27. Mease P, Hall S, FitzGerald O, van der Heijde D, Merola JF, Avila-Zapata F, et al. Tofacitinib or Adalimumab versus Placebo for Psoriatic Arthritis. *N Engl J Med*. 2017 10 19; 377(16):1537-1550.



28. Araujo EG, Finzel S, Englbrecht M, Schreiber DA, Faustini F, Hueber A, et al. High incidence of disease recurrence after discontinuation of disease-modifying antirheumatic drug treatment in patients with psoriatic arthritis in remission. *Annals of the Rheumatic Diseases*. 2015 Apr; 74(4):655-660.
29. Moverley A, Coates L, Marzo-Ortega H, Waxman R, Torgerson D, Cocks K, et al. A feasibility study for a randomised controlled trial of treatment withdrawal in psoriatic arthritis (REmoval of treatment for patients in REmission in psoriatic ArThritis (RETREAT (F))). *Clinical Rheumatology*. 2015 Aug; 34(8):1407-1412.
30. Kristensen LE, Lie E, Jacobsson LT, Christensen R, Mease PJ, Bliddal H, et al. Effectiveness and Feasibility Associated with Switching to a Second or Third TNF Inhibitor in Patients with Psoriatic Arthritis: A Cohort Study from Southern Sweden. *Journal of Rheumatology*. 2016 Jan; 43(1):81-87.
31. Kivitz AJ, Papp K, Devani A, Pinter A, Sinclair R, Ziv M, et al. Randomized, double-blind study comparing CHS-0214 with etanercept (ENBREL) in patients with psoriasis and psoriatic arthritis. *Arthritis and rheumatology Conference: american college of rheumatology/association of rheumatology health professionals annual scientific meeting, ACR/ARHP 2016 United states Conference start: 20161111 Conference end: 20161116*. 2016; 68:2142-2143.
32. Jorgensen KK, Olsen IC, Goll GL, Lorentzen M, Bolstad N, Haavardsholm EA, et al. Switching from originator infliximab to biosimilar CT-P13 compared with maintained treatment with originator infliximab (NOR-SWITCH): a 52-week, randomised, double-blind, non-inferiority trial.[Erratum appears in *Lancet*. 2017 Jun 10;389(10086):2286; PMID: 28549661]. *Lancet*. 2017 06 10; 389(10086):2304-2316.
33. Glintborg B, Sorensen IJ, Loft AG, Lindegaard H, Linauskas A, Hendricks O, et al. A nationwide non-medical switch from originator infliximab to biosimilar CT-P13 in 802 patients with inflammatory arthritis: 1-year clinical outcomes from the DANBIO registry. *Annals of the Rheumatic Diseases*. 2017 Aug; 76(8):1426-1431.
34. Mease PJ, Kellner H, Morita A, Kivitz AJ, Papp KA, Aslanyan S, et al. Efficacy and safety of risankizumab, a selective IL-23p19 inhibitor, in patients with active psoriatic arthritis over 24 weeks: results from a phase 2 trial. *Annals of the rheumatic diseases Conference: annual european congress of rheumatology, EULAR 2018 Netherlands*. 2018; 77(Supplement 2):200-201.
